# Supplementary material for: FOXP2 confers oncogenic effects in prostate cancer
Source: eLife. 2023 Sep 5;12:e81258. doi: 10.7554/eLife.81258 (PMC10513481; doi:10.7554/eLife.81258)
Supplement: Supplementary file 2. [file elife-81258-supp2.xlsx]

## Sheet: Supplementary File 2
Supplementary File 2. Correlation analyses between individual gene expression and FOXP2 expression in 255 primary prostate tumors from TCGA (provisional) that is composed of 15 FOXP2-negative tumors, 120 FOXP2 low expression tumors and 120 FOXP2 high expression tumors. Expression level of 1322 genes showed a less than or equal to 0.5 invert correlation with FOXP2 expression. Expression levels of …
Gene	Spearman' rho	adjusted P value (FDR)	adjusted P value (Bonferroni correction)
PKP3	-0.764881	2e-50	3.09e-46
RRP9	-0.759864	2.05e-49	3.17e-45
ZMYND19	-0.751647	8.19e-48	1.27e-43
BOLA2	-0.748756	2.9e-47	4.49e-43
PPP1R14B	-0.72999	7.1e-44	1.1e-39
MLST8	-0.72617	3.21e-43	4.97e-39
LSM4	-0.724591	5.94e-43	9.2e-39
NME1	-0.71975	3.83e-42	5.93e-38
NDUFB10	-0.718602	5.92e-42	9.16e-38
MRPS34	-0.716718	1.2e-41	1.86e-37
PAM16	-0.715256	2.08e-41	3.22e-37
PSMG3	-0.714685	2.58e-41	3.99e-37
PDCD2L	-0.714366	2.9e-41	4.49e-37
MRPL24	-0.713636	3.8e-41	5.89e-37
FLAD1	-0.711261	9.14e-41	1.41e-36
PSMD13	-0.709748	1.59e-40	2.46e-36
HYPK	-0.708738	2.3e-40	3.55e-36
UBE2M	-0.706109	5.93e-40	9.18e-36
NIT2	-0.705774	6.69e-40	1.04e-35
YIF1A	-0.702247	2.35e-39	3.63e-35
PPM1G	-0.702092	2.48e-39	3.84e-35
ICT1	-0.702003	2.56e-39	3.96e-35
SNRPA1	-0.701882	2.67e-39	4.13e-35
POLR1C	-0.700274	4.7e-39	7.28e-35
TRMU	-0.700065	5.06e-39	7.83e-35
NUDT16L1	-0.6999	5.36e-39	8.29e-35
SAC3D1	-0.699807	5.53e-39	8.57e-35
ATP5G1	-0.698627	8.35e-39	1.29e-34
UBE2S	-0.698058	1.02e-38	1.58e-34
TOMM40	-0.696115	1.99e-38	3.09e-34
MRPS26	-0.695909	2.14e-38	3.31e-34
TIMM50	-0.695756	2.26e-38	3.49e-34
FAM195A	-0.695491	2.47e-38	3.83e-34
C16ORF13	-0.6953	2.64e-38	4.08e-34
POLDIP2	-0.694849	3.08e-38	4.77e-34
TELO2	-0.694542	3.42e-38	5.3e-34
NOP16	-0.692879	6.03e-38	9.34e-34
MRPL14	-0.692853	6.09e-38	9.42e-34
PGP	-0.692502	6.86e-38	1.06e-33
DDX49	-0.691701	8.99e-38	1.39e-33
POLR2H	-0.69145	9.79e-38	1.52e-33
DNAJC7	-0.690951	1.16e-37	1.79e-33
SYNE4	-0.690343	1.42e-37	2.2e-33
POLR3K	-0.690062	1.56e-37	2.42e-33
MRPS15	-0.690018	1.59e-37	2.46e-33
PPIA	-0.688975	2.25e-37	3.48e-33
EIF2B4	-0.688645	2.51e-37	3.89e-33
PTRH2	-0.688605	2.55e-37	3.94e-33
EXOSC4	-0.687068	4.25e-37	6.58e-33
RPL26L1	-0.686582	4.99e-37	7.73e-33
NHP2	-0.686505	5.12e-37	7.93e-33
PRELID1	-0.683801	1.25e-36	1.93e-32
SLC25A10	-0.68266	1.81e-36	2.81e-32
TIMM8B	-0.681605	2.55e-36	3.96e-32
PDCD5	-0.681367	2.76e-36	4.27e-32
SNRPB	-0.6805	3.65e-36	5.66e-32
NOL12	-0.680106	4.15e-36	6.43e-32
PPP4C	-0.68009	4.17e-36	6.46e-32
TIMM10	-0.67994	4.38e-36	6.78e-32
ANAPC11	-0.679531	5e-36	7.74e-32
COA4	-0.679429	5.16e-36	7.99e-32
PDCD6	-0.678578	6.79e-36	1.05e-31
POLR2F	-0.677569	9.38e-36	1.45e-31
PLEKHJ1	-0.677114	1.08e-35	1.68e-31
TMEM186	-0.676918	1.15e-35	1.79e-31
TIMM13	-0.676584	1.28e-35	1.99e-31
NR2C2AP	-0.676538	1.3e-35	2.02e-31
ARPC5L	-0.676149	1.47e-35	2.28e-31
NR2F6	-0.675591	1.76e-35	2.73e-31
LAS1L	-0.674917	2.18e-35	3.37e-31
ATPIF1	-0.674745	2.3e-35	3.56e-31
ATAD3A	-0.673991	2.92e-35	4.52e-31
NOC2L	-0.673486	3.42e-35	5.3e-31
SRM	-0.673239	3.7e-35	5.73e-31
MRPL12	-0.673199	3.75e-35	5.8e-31
FAM71E1	-0.67299	4e-35	6.19e-31
TRPT1	-0.672921	4.09e-35	6.33e-31
HSD17B10	-0.67223	5.08e-35	7.86e-31
POLD2	-0.671641	6.1e-35	9.45e-31
MRTO4	-0.671425	6.53e-35	1.01e-30
ATP5H	-0.671403	6.57e-35	1.02e-30
LSM3	-0.671355	6.67e-35	1.03e-30
POP7	-0.670583	8.48e-35	1.31e-30
NAA10	-0.670181	9.61e-35	1.49e-30
RSAD1	-0.669839	1.07e-34	1.66e-30
UBE2J2	-0.669601	1.15e-34	1.78e-30
PAFAH1B3	-0.669271	1.27e-34	1.97e-30
MRPS12	-0.669247	1.28e-34	1.99e-30
HSPE1	-0.668825	1.46e-34	2.26e-30
RHPN1	-0.668407	1.66e-34	2.58e-30
RRP1	-0.667013	2.55e-34	3.96e-30
DHPS	-0.666692	2.82e-34	4.36e-30
ASPSCR1	-0.666659	2.85e-34	4.41e-30
CLPP	-0.666595	2.9e-34	4.5e-30
PFDN6	-0.666507	2.98e-34	4.62e-30
PMPCA	-0.666403	3.08e-34	4.77e-30
SFXN4	-0.666043	3.44e-34	5.32e-30
COX5A	-0.665673	3.85e-34	5.96e-30
NME3	-0.665405	4.18e-34	6.47e-30
TALDO1	-0.665361	4.23e-34	6.56e-30
C16ORF59	-0.664642	5.27e-34	8.16e-30
NPRL2	-0.663457	7.55e-34	1.17e-29
NDUFA7	-0.663278	7.97e-34	1.23e-29
PDCL3	-0.663269	7.99e-34	1.24e-29
PPIH	-0.663096	8.42e-34	1.3e-29
NDUFAB1	-0.662763	9.31e-34	1.44e-29
MIF	-0.662724	9.42e-34	1.46e-29
PSMA5	-0.662385	1.04e-33	1.62e-29
B3GALT6	-0.661691	1.29e-33	1.99e-29
PCGF1	-0.66153	1.35e-33	2.09e-29
TMA7	-0.659913	2.19e-33	3.39e-29
OAZ1	-0.659793	2.27e-33	3.51e-29
SNRPG	-0.659772	2.28e-33	3.54e-29
EIF3I	-0.659256	2.66e-33	4.12e-29
UQCC2	-0.659016	2.86e-33	4.43e-29
SURF2	-0.658648	3.19e-33	4.94e-29
NDUFV2	-0.658397	3.44e-33	5.32e-29
PSMB5	-0.658303	3.53e-33	5.47e-29
NUBP2	-0.657894	3.99e-33	6.18e-29
CNPY2	-0.657863	4.03e-33	6.23e-29
PTRH1	-0.657589	4.37e-33	6.76e-29
TRMT2A	-0.657465	4.53e-33	7.01e-29
MARCH9	-0.657384	4.64e-33	7.18e-29
TMEM183A	-0.657294	4.76e-33	7.38e-29
LAMTOR2	-0.656715	5.65e-33	8.75e-29
MXD3	-0.656693	5.69e-33	8.81e-29
COX6A1	-0.656512	6e-33	9.29e-29
FBXL6	-0.655899	7.19e-33	1.11e-28
SMIM4	-0.655882	7.22e-33	1.12e-28
C6ORF136	-0.655339	8.47e-33	1.31e-28
RUVBL2	-0.655188	8.85e-33	1.37e-28
PMS2P1	-0.655057	9.2e-33	1.42e-28
PPAN	-0.654595	1.05e-32	1.63e-28
SLC25A22	-0.654312	1.14e-32	1.77e-28
SNRPE	-0.654189	1.19e-32	1.84e-28
PDAP1	-0.65415	1.2e-32	1.86e-28
METTL1	-0.654113	1.21e-32	1.88e-28
UBL5	-0.653869	1.3e-32	2.02e-28
STUB1	-0.65378	1.34e-32	2.07e-28
TXN	-0.65345	1.47e-32	2.28e-28
CFL1	-0.653438	1.48e-32	2.29e-28
NDUFB1	-0.653396	1.49e-32	2.31e-28
SSBP1	-0.653093	1.63e-32	2.53e-28
TMEM129	-0.653055	1.65e-32	2.55e-28
PYCRL	-0.653046	1.65e-32	2.56e-28
MCAT	-0.653038	1.66e-32	2.57e-28
C9ORF69	-0.652819	1.77e-32	2.74e-28
PRPF19	-0.652594	1.89e-32	2.92e-28
ARHGDIA	-0.652466	1.96e-32	3.03e-28
MRPL47	-0.652211	2.11e-32	3.26e-28
C14ORF2	-0.652186	2.12e-32	3.29e-28
OXLD1	-0.652103	2.18e-32	3.37e-28
TCEB1	-0.651983	2.25e-32	3.49e-28
TMEM134	-0.651912	2.3e-32	3.56e-28
DDX39A	-0.651346	2.71e-32	4.19e-28
LAMTOR5	-0.651072	2.93e-32	4.54e-28
PSMB1	-0.650778	3.19e-32	4.94e-28
UQCRH	-0.65005	3.93e-32	6.09e-28
SCAMP3	-0.649792	4.24e-32	6.56e-28
SNRPF	-0.649671	4.39e-32	6.79e-28
ATG4D	-0.649112	5.15e-32	7.97e-28
DTYMK	-0.648845	5.56e-32	8.6e-28
FIBP	-0.648536	6.07e-32	9.4e-28
ACOT8	-0.647772	7.55e-32	1.17e-27
PPP1CA	-0.647388	8.42e-32	1.3e-27
ARMC6	-0.647335	8.55e-32	1.32e-27
TAF10	-0.647032	9.32e-32	1.44e-27
EIF3B	-0.646974	9.48e-32	1.47e-27
C12ORF73	-0.646618	1.05e-31	1.62e-27
SNRPD3	-0.646439	1.1e-31	1.71e-27
ATP6V0B	-0.646371	1.12e-31	1.74e-27
HMOX2	-0.646068	1.23e-31	1.9e-27
C14ORF166	-0.645901	1.28e-31	1.99e-27
TRUB2	-0.645891	1.29e-31	1.99e-27
MTX1	-0.6456	1.4e-31	2.17e-27
ADRM1	-0.644767	1.77e-31	2.74e-27
C11ORF31	-0.644738	1.78e-31	2.76e-27
GPR137	-0.644727	1.79e-31	2.77e-27
TRAF4	-0.644582	1.86e-31	2.89e-27
FASTK	-0.644278	2.03e-31	3.14e-27
ARF5	-0.643507	2.52e-31	3.9e-27
BAD	-0.643348	2.64e-31	4.08e-27
UFSP1	-0.643312	2.66e-31	4.12e-27
PFDN2	-0.643144	2.79e-31	4.32e-27
CCT3	-0.642906	2.98e-31	4.62e-27
ATP5I	-0.642612	3.24e-31	5.02e-27
PSMB4	-0.642568	3.28e-31	5.08e-27
WBSCR22	-0.642532	3.31e-31	5.13e-27
MRPS7	-0.64243	3.41e-31	5.28e-27
AUP1	-0.642287	3.55e-31	5.49e-27
RBM4	-0.641955	3.89e-31	6.03e-27
FAM50A	-0.641818	4.04e-31	6.26e-27
PSMB3	-0.641506	4.41e-31	6.83e-27
TRMT112	-0.640933	5.17e-31	8.01e-27
TUFM	-0.640635	5.62e-31	8.7e-27
PRDX2	-0.640602	5.67e-31	8.78e-27
SRRT	-0.640346	6.09e-31	9.43e-27
HGH1	-0.640342	6.1e-31	9.44e-27
PAGR1	-0.639959	6.78e-31	1.05e-26
JTB	-0.639916	6.86e-31	1.06e-26
PSMA6	-0.639287	8.16e-31	1.26e-26
CYSRT1	-0.638976	8.89e-31	1.38e-26
SLIRP	-0.638761	9.44e-31	1.46e-26
NDUFS6	-0.638713	9.56e-31	1.48e-26
USMG5	-0.638683	9.64e-31	1.49e-26
RAC3	-0.638592	9.88e-31	1.53e-26
CYC1	-0.63828	1.08e-30	1.67e-26
MRPL23	-0.638219	1.1e-30	1.7e-26
SNRPD2	-0.638184	1.11e-30	1.71e-26
RPUSD1	-0.638041	1.15e-30	1.78e-26
RALY	-0.637943	1.18e-30	1.83e-26
HRAS	-0.637719	1.26e-30	1.95e-26
LOC148413	-0.637414	1.37e-30	2.12e-26
AKT1S1	-0.637265	1.42e-30	2.2e-26
SF3B6	-0.637122	1.48e-30	2.29e-26
FARSA	-0.636956	1.55e-30	2.4e-26
SNRPC	-0.636418	1.79e-30	2.78e-26
PDDC1	-0.636169	1.92e-30	2.97e-26
EXOSC5	-0.636129	1.94e-30	3.01e-26
PMM2	-0.636127	1.94e-30	3.01e-26
LRRC45	-0.636072	1.97e-30	3.05e-26
SLC25A39	-0.636031	1.99e-30	3.09e-26
FAM173A	-0.635971	2.03e-30	3.14e-26
SIGIRR	-0.635869	2.08e-30	3.23e-26
PARK7	-0.635512	2.3e-30	3.56e-26
PNKP	-0.635436	2.35e-30	3.63e-26
RANGAP1	-0.635391	2.37e-30	3.68e-26
COASY	-0.635216	2.49e-30	3.86e-26
DVL1	-0.635158	2.53e-30	3.92e-26
TOMM6	-0.635023	2.62e-30	4.06e-26
RNF126	-0.634936	2.69e-30	4.16e-26
STRA13	-0.634836	2.76e-30	4.28e-26
RANBP1	-0.634704	2.86e-30	4.43e-26
C15ORF61	-0.634259	3.23e-30	5e-26
NSUN5	-0.633691	3.77e-30	5.83e-26
SEC61G	-0.632806	4.78e-30	7.41e-26
GRPEL1	-0.632768	4.83e-30	7.48e-26
AURKAIP1	-0.63249	5.21e-30	8.07e-26
PQBP1	-0.632428	5.3e-30	8.2e-26
SDCCAG3	-0.631803	6.27e-30	9.7e-26
WDR13	-0.631738	6.38e-30	9.87e-26
CTU1	-0.631545	6.72e-30	1.04e-25
NDUFA8	-0.63149	6.82e-30	1.06e-25
MRPL20	-0.630767	8.27e-30	1.28e-25
ECI1	-0.63049	8.91e-30	1.38e-25
TSSC1	-0.630486	8.92e-30	1.38e-25
PPP1R35	-0.630391	9.15e-30	1.42e-25
C19ORF24	-0.630115	9.85e-30	1.52e-25
GPS1	-0.630022	1.01e-29	1.56e-25
HAGH	-0.629852	1.06e-29	1.64e-25
MFSD3	-0.629674	1.11e-29	1.72e-25
CDK5	-0.62964	1.12e-29	1.73e-25
CACFD1	-0.629588	1.13e-29	1.75e-25
ROMO1	-0.629549	1.15e-29	1.77e-25
NMRAL1	-0.629483	1.17e-29	1.81e-25
ATRIP	-0.629416	1.19e-29	1.84e-25
ESRRA	-0.628893	1.36e-29	2.11e-25
CHCHD1	-0.628798	1.4e-29	2.17e-25
ATP5J2	-0.628509	1.51e-29	2.34e-25
COPE	-0.628267	1.61e-29	2.49e-25
DNPH1	-0.628258	1.61e-29	2.5e-25
SSU72	-0.628144	1.66e-29	2.58e-25
LAGE3	-0.627921	1.76e-29	2.73e-25
MRPS21	-0.627601	1.92e-29	2.97e-25
FKBP3	-0.627589	1.93e-29	2.98e-25
ATP6V0C	-0.627147	2.17e-29	3.35e-25
COX17	-0.626754	2.4e-29	3.72e-25
LSM7	-0.626622	2.49e-29	3.85e-25
TMEM258	-0.626603	2.5e-29	3.87e-25
MRPS11	-0.626598	2.5e-29	3.88e-25
RNASEH2A	-0.626462	2.6e-29	4.02e-25
CCT7	-0.626308	2.7e-29	4.18e-25
NARFL	-0.62622	2.77e-29	4.28e-25
PIGQ	-0.626126	2.83e-29	4.39e-25
COX7A2	-0.626082	2.87e-29	4.44e-25
GPX4	-0.626079	2.87e-29	4.44e-25
CUTA	-0.625958	2.96e-29	4.59e-25
TBRG4	-0.625954	2.97e-29	4.59e-25
SLC25A33	-0.625888	3.02e-29	4.67e-25
CCDC58	-0.625563	3.29e-29	5.09e-25
CSNK2B	-0.625541	3.31e-29	5.12e-25
QPCTL	-0.625364	3.46e-29	5.36e-25
PSMA3	-0.624367	4.5e-29	6.96e-25
PTS	-0.624189	4.71e-29	7.3e-25
SUGP1	-0.624006	4.94e-29	7.65e-25
MRPL41	-0.623981	4.97e-29	7.7e-25
KIF9	-0.623737	5.3e-29	8.21e-25
GLRX5	-0.623595	5.5e-29	8.52e-25
TOR2A	-0.623477	5.67e-29	8.78e-25
AP1M2	-0.623467	5.69e-29	8.81e-25
ZBTB8OS	-0.623217	6.07e-29	9.4e-25
TCEB2	-0.623127	6.22e-29	9.62e-25
NDUFA2	-0.623043	6.35e-29	9.84e-25
COX5B	-0.623001	6.42e-29	9.94e-25
NDUFB9	-0.622887	6.61e-29	1.02e-24
AIFM1	-0.622754	6.85e-29	1.06e-24
CHTF18	-0.62263	7.07e-29	1.1e-24
SNRNP25	-0.622048	8.23e-29	1.27e-24
NDUFV3	-0.621967	8.4e-29	1.3e-24
RNPS1	-0.621884	8.58e-29	1.33e-24
COX7B	-0.62154	9.38e-29	1.45e-24
USF2	-0.621487	9.51e-29	1.47e-24
DRG1	-0.621405	9.72e-29	1.5e-24
MRPL57	-0.621234	1.02e-28	1.57e-24
GGA1	-0.620883	1.11e-28	1.72e-24
POLR2I	-0.620738	1.15e-28	1.79e-24
TMEM147	-0.620545	1.21e-28	1.88e-24
FAM136A	-0.620317	1.29e-28	1.99e-24
NDUFB11	-0.620175	1.33e-28	2.07e-24
CWC15	-0.619993	1.4e-28	2.17e-24
MRPS33	-0.61993	1.42e-28	2.2e-24
EDF1	-0.619686	1.51e-28	2.34e-24
COX8A	-0.61967	1.52e-28	2.35e-24
NDUFA3	-0.619498	1.59e-28	2.46e-24
SDHAF1	-0.619394	1.63e-28	2.53e-24
NDUFS8	-0.619356	1.65e-28	2.55e-24
HN1	-0.618981	1.81e-28	2.81e-24
NME2	-0.618855	1.87e-28	2.9e-24
LCMT1	-0.618693	1.95e-28	3.02e-24
BUD31	-0.618567	2.02e-28	3.12e-24
CDK16	-0.618524	2.04e-28	3.16e-24
DAZAP1	-0.618409	2.1e-28	3.25e-24
TAF6L	-0.617959	2.36e-28	3.65e-24
NDUFC2	-0.617896	2.39e-28	3.71e-24
PSMB7	-0.617799	2.45e-28	3.8e-24
RHOT2	-0.617783	2.47e-28	3.82e-24
NDUFA1	-0.617728	2.5e-28	3.87e-24
ZNHIT2	-0.61771	2.51e-28	3.89e-24
DGUOK	-0.61707	2.96e-28	4.58e-24
UFD1L	-0.616557	3.37e-28	5.22e-24
DRAP1	-0.616183	3.7e-28	5.74e-24
ATP5L	-0.616141	3.74e-28	5.8e-24
AKR1A1	-0.616088	3.79e-28	5.88e-24
UROS	-0.615942	3.94e-28	6.1e-24
PRKCSH	-0.615905	3.98e-28	6.16e-24
TRABD	-0.615787	4.1e-28	6.34e-24
TOMM22	-0.615748	4.14e-28	6.41e-24
NDUFA13	-0.615622	4.27e-28	6.61e-24
COX6B1	-0.615554	4.35e-28	6.73e-24
AK2	-0.615504	4.4e-28	6.82e-24
NAT9	-0.615385	4.53e-28	7.02e-24
BLOC1S4	-0.615363	4.56e-28	7.06e-24
PRCC	-0.615286	4.65e-28	7.2e-24
TOMM5	-0.614452	5.74e-28	8.89e-24
ANKS3	-0.614409	5.8e-28	8.99e-24
TSFM	-0.614104	6.27e-28	9.71e-24
SLC52A2	-0.613985	6.46e-28	1e-23
CLN6	-0.613644	7.04e-28	1.09e-23
MIEN1	-0.613534	7.24e-28	1.12e-23
TXNL4A	-0.613137	7.99e-28	1.24e-23
MRPS28	-0.612442	9.52e-28	1.47e-23
BIK	-0.611924	1.08e-27	1.68e-23
SCYL1	-0.611859	1.1e-27	1.71e-23
B3GAT3	-0.611753	1.13e-27	1.75e-23
PES1	-0.611507	1.2e-27	1.86e-23
PSMD4	-0.611159	1.31e-27	2.03e-23
SLC25A1	-0.611009	1.36e-27	2.11e-23
BANF1	-0.610896	1.4e-27	2.17e-23
MAZ	-0.610433	1.57e-27	2.43e-23
OST4	-0.61041	1.58e-27	2.45e-23
HSPBP1	-0.610218	1.66e-27	2.57e-23
TRIM28	-0.610083	1.71e-27	2.65e-23
LAMTOR1	-0.61008	1.72e-27	2.66e-23
BYSL	-0.609961	1.77e-27	2.74e-23
MON1A	-0.609686	1.89e-27	2.93e-23
RASSF7	-0.609643	1.91e-27	2.96e-23
RBX1	-0.609638	1.91e-27	2.96e-23
MYL5	-0.609443	2.01e-27	3.11e-23
COMTD1	-0.60938	2.04e-27	3.16e-23
IFI27L1	-0.60938	2.04e-27	3.16e-23
ZDHHC24	-0.6091	2.19e-27	3.39e-23
PSMA7	-0.609086	2.2e-27	3.4e-23
EBNA1BP2	-0.608925	2.28e-27	3.54e-23
ITPA	-0.60881	2.35e-27	3.64e-23
PTGES2	-0.608751	2.38e-27	3.69e-23
MRPS17	-0.608634	2.45e-27	3.8e-23
C17ORF89	-0.608322	2.65e-27	4.11e-23
ADSL	-0.608262	2.69e-27	4.17e-23
DCUN1D5	-0.60803	2.85e-27	4.41e-23
MRPL16	-0.607651	3.13e-27	4.84e-23
GEMIN7	-0.607562	3.2e-27	4.95e-23
HMBS	-0.607491	3.25e-27	5.04e-23
SNRPD1	-0.607109	3.58e-27	5.54e-23
TARBP2	-0.606842	3.82e-27	5.91e-23
NDUFB2	-0.606574	4.08e-27	6.31e-23
SEPT5	-0.606455	4.2e-27	6.5e-23
SDR39U1	-0.605944	4.76e-27	7.37e-23
IFRD2	-0.605825	4.9e-27	7.58e-23
BTBD6	-0.605689	5.06e-27	7.84e-23
CCDC159	-0.605433	5.39e-27	8.35e-23
ARPC4	-0.605423	5.4e-27	8.37e-23
H2AFX	-0.60498	6.02e-27	9.33e-23
HTRA2	-0.604897	6.15e-27	9.52e-23
SNRPA	-0.604624	6.57e-27	1.02e-22
MRPL53	-0.604132	7.4e-27	1.15e-22
FAM98C	-0.604093	7.47e-27	1.16e-22
DDX56	-0.603881	7.87e-27	1.22e-22
ZNF668	-0.603778	8.07e-27	1.25e-22
CINP	-0.603771	8.08e-27	1.25e-22
E4F1	-0.603738	8.15e-27	1.26e-22
EEF2KMT	-0.60369	8.24e-27	1.28e-22
GFER	-0.6035	8.63e-27	1.34e-22
C1ORF35	-0.603373	8.9e-27	1.38e-22
ZFPL1	-0.603336	8.98e-27	1.39e-22
TIMM17B	-0.60316	9.37e-27	1.45e-22
SSSCA1	-0.603085	9.55e-27	1.48e-22
PRDX5	-0.602969	9.82e-27	1.52e-22
PDXP	-0.602874	1e-26	1.56e-22
RAB24	-0.602806	1.02e-26	1.58e-22
DDX41	-0.602636	1.06e-26	1.65e-22
PGLS	-0.602317	1.15e-26	1.78e-22
SAMD10	-0.60229	1.16e-26	1.79e-22
NCBP2-AS2	-0.602068	1.22e-26	1.89e-22
CHCHD2	-0.601998	1.24e-26	1.92e-22
C21ORF33	-0.601678	1.34e-26	2.08e-22
EMC10	-0.601651	1.35e-26	2.09e-22
HPN	-0.60165	1.35e-26	2.09e-22
DPM3	-0.601633	1.36e-26	2.1e-22
UQCRQ	-0.601427	1.43e-26	2.21e-22
ZNF787	-0.601221	1.5e-26	2.32e-22
MALSU1	-0.60114	1.53e-26	2.36e-22
MRPS16	-0.600994	1.58e-26	2.45e-22
BAX	-0.600954	1.6e-26	2.47e-22
NDUFA10	-0.600635	1.72e-26	2.67e-22
ENSA	-0.600631	1.73e-26	2.67e-22
CEMP1	-0.600523	1.77e-26	2.74e-22
UQCR11	-0.600422	1.81e-26	2.81e-22
PSME2	-0.600345	1.85e-26	2.86e-22
RPP21	-0.600205	1.91e-26	2.96e-22
FAM89B	-0.59982	2.1e-26	3.25e-22
NELFE	-0.59977	2.12e-26	3.29e-22
RPS19BP1	-0.599758	2.13e-26	3.3e-22
EIF2B5	-0.599629	2.2e-26	3.4e-22
TRIM11	-0.599429	2.3e-26	3.57e-22
NDUFAF3	-0.599381	2.33e-26	3.61e-22
MRPL22	-0.599337	2.35e-26	3.65e-22
TPRN	-0.599228	2.42e-26	3.74e-22
MACROD1	-0.599182	2.44e-26	3.78e-22
HEBP2	-0.599034	2.53e-26	3.92e-22
MRGBP	-0.598909	2.61e-26	4.04e-22
KRTCAP2	-0.598597	2.81e-26	4.35e-22
MIIP	-0.598543	2.85e-26	4.41e-22
COMMD5	-0.598455	2.91e-26	4.5e-22
RPL37A	-0.598274	3.03e-26	4.7e-22
SSR2	-0.598202	3.09e-26	4.78e-22
RUVBL1	-0.598036	3.21e-26	4.97e-22
HNRNPL	-0.597876	3.34e-26	5.17e-22
FARSB	-0.597617	3.55e-26	5.49e-22
POLR2L	-0.597059	4.05e-26	6.27e-22
CHMP2A	-0.596941	4.17e-26	6.45e-22
PIN4	-0.596434	4.7e-26	7.27e-22
NOL7	-0.596428	4.7e-26	7.28e-22
MRPL48	-0.596254	4.9e-26	7.59e-22
ZSCAN16	-0.596251	4.91e-26	7.6e-22
TMEM191A	-0.59588	5.36e-26	8.29e-22
BOLA3	-0.595831	5.42e-26	8.39e-22
VPS28	-0.595686	5.61e-26	8.68e-22
CDK2AP2	-0.595487	5.88e-26	9.1e-22
WDR74	-0.595426	5.96e-26	9.23e-22
IFT27	-0.595067	6.49e-26	1e-21
IFT20	-0.595046	6.52e-26	1.01e-21
GTPBP6	-0.595016	6.57e-26	1.02e-21
AAAS	-0.594636	7.18e-26	1.11e-21
UQCC3	-0.594599	7.24e-26	1.12e-21
PPIB	-0.594402	7.59e-26	1.17e-21
NOP58	-0.594233	7.89e-26	1.22e-21
C7ORF55	-0.593962	8.41e-26	1.3e-21
GEMIN6	-0.59369	8.97e-26	1.39e-21
PTRHD1	-0.593318	9.78e-26	1.51e-21
BRAT1	-0.593297	9.83e-26	1.52e-21
C19ORF70	-0.592967	1.06e-25	1.64e-21
RAB1B	-0.592874	1.09e-25	1.68e-21
MRPL37	-0.59227	1.25e-25	1.94e-21
RPLP1	-0.591806	1.39e-25	2.16e-21
COPS6	-0.591519	1.49e-25	2.31e-21
TMEM126A	-0.59141	1.53e-25	2.37e-21
PWWP2B	-0.591211	1.6e-25	2.48e-21
RAD23A	-0.591115	1.64e-25	2.53e-21
SEC61B	-0.591099	1.64e-25	2.54e-21
TUSC2	-0.590837	1.75e-25	2.7e-21
UQCRHL	-0.590806	1.76e-25	2.72e-21
ALYREF	-0.59074	1.78e-25	2.76e-21
COX6C	-0.590721	1.79e-25	2.78e-21
VTI1B	-0.590615	1.84e-25	2.85e-21
P4HTM	-0.590382	1.94e-25	3e-21
B3GNTL1	-0.590375	1.94e-25	3.01e-21
MZT2B	-0.590303	1.98e-25	3.06e-21
UQCRC1	-0.590216	2.02e-25	3.12e-21
NOP56	-0.590054	2.09e-25	3.24e-21
AAMP	-0.589841	2.2e-25	3.4e-21
RPL19	-0.589655	2.29e-25	3.55e-21
GNL2	-0.589468	2.4e-25	3.71e-21
IMP4	-0.589361	2.46e-25	3.8e-21
SNHG9	-0.589331	2.47e-25	3.83e-21
PIGU	-0.58929	2.5e-25	3.87e-21
LSM5	-0.589278	2.5e-25	3.88e-21
DYNLT1	-0.589273	2.51e-25	3.88e-21
CAPN10	-0.589123	2.6e-25	4.02e-21
RPL37	-0.589047	2.64e-25	4.09e-21
HNRNPAB	-0.58897	2.69e-25	4.16e-21
MAPKAPK5-AS1	-0.588951	2.7e-25	4.18e-21
EXOSC9	-0.588938	2.71e-25	4.19e-21
SCAND1	-0.588372	3.09e-25	4.78e-21
RNASEH2C	-0.588254	3.17e-25	4.91e-21
ARPC3	-0.588157	3.24e-25	5.02e-21
LINC00493	-0.588104	3.28e-25	5.08e-21
FBXW9	-0.588015	3.35e-25	5.19e-21
ALKBH2	-0.58786	3.47e-25	5.38e-21
DPY30	-0.587759	3.55e-25	5.5e-21
VPS72	-0.587694	3.61e-25	5.58e-21
ARVCF	-0.587359	3.89e-25	6.03e-21
TLCD1	-0.587268	3.98e-25	6.16e-21
PABPN1	-0.58709	4.14e-25	6.41e-21
EEFSEC	-0.587082	4.15e-25	6.43e-21
TSEN34	-0.586904	4.32e-25	6.69e-21
MDH2	-0.586558	4.68e-25	7.25e-21
C19ORF48	-0.586456	4.79e-25	7.42e-21
UQCRB	-0.586417	4.83e-25	7.48e-21
RFXANK	-0.586274	4.99e-25	7.73e-21
C19ORF73	-0.586097	5.2e-25	8.05e-21
METRN	-0.585926	5.41e-25	8.37e-21
MEA1	-0.585875	5.47e-25	8.47e-21
CISD3	-0.58568	5.72e-25	8.85e-21
NOP10	-0.585498	5.96e-25	9.23e-21
ZNF593	-0.585393	6.1e-25	9.45e-21
ATP5D	-0.585366	6.14e-25	9.51e-21
GDI1	-0.585294	6.24e-25	9.67e-21
PSMC4	-0.585027	6.64e-25	1.03e-20
GET4	-0.584922	6.8e-25	1.05e-20
NDUFB7	-0.58492	6.8e-25	1.05e-20
RNF208	-0.584881	6.86e-25	1.06e-20
ANKRD39	-0.584348	7.74e-25	1.2e-20
LBHD1	-0.584308	7.81e-25	1.21e-20
SHFM1	-0.58418	8.04e-25	1.25e-20
YIF1B	-0.583973	8.43e-25	1.31e-20
IRF2BP1	-0.583802	8.76e-25	1.36e-20
CECR5	-0.583503	9.38e-25	1.45e-20
PA2G4	-0.583139	1.02e-24	1.58e-20
MRPS5	-0.583008	1.05e-24	1.62e-20
RHBDD3	-0.582973	1.06e-24	1.64e-20
GADD45GIP1	-0.582771	1.11e-24	1.71e-20
ATP5G2	-0.582757	1.11e-24	1.72e-20
MRPL27	-0.582743	1.11e-24	1.72e-20
ERI3	-0.582687	1.13e-24	1.75e-20
ENY2	-0.582493	1.18e-24	1.82e-20
RFC2	-0.582448	1.19e-24	1.84e-20
PUF60	-0.582306	1.23e-24	1.9e-20
REXO4	-0.582197	1.26e-24	1.95e-20
NCLN	-0.582197	1.26e-24	1.95e-20
MFSD10	-0.58206	1.3e-24	2.01e-20
SYNGR2	-0.582035	1.31e-24	2.02e-20
SNHG3	-0.582023	1.31e-24	2.03e-20
MTG1	-0.581949	1.33e-24	2.06e-20
PHPT1	-0.581849	1.36e-24	2.11e-20
DDT	-0.581798	1.38e-24	2.13e-20
C9ORF142	-0.581681	1.41e-24	2.19e-20
HES4	-0.581366	1.52e-24	2.35e-20
RPL38	-0.581349	1.52e-24	2.36e-20
C14ORF80	-0.581291	1.54e-24	2.39e-20
RNF113A	-0.581026	1.64e-24	2.54e-20
RPL7A	-0.580959	1.66e-24	2.58e-20
POC1A	-0.580718	1.76e-24	2.72e-20
ATP5C1	-0.580607	1.8e-24	2.79e-20
STX18	-0.58053	1.83e-24	2.84e-20
NT5M	-0.580495	1.85e-24	2.86e-20
RNF215	-0.58044	1.87e-24	2.9e-20
RPL28	-0.58037	1.9e-24	2.94e-20
GTF3A	-0.580234	1.96e-24	3.03e-20
FAAP100	-0.57963	2.24e-24	3.47e-20
INO80B	-0.57955	2.28e-24	3.53e-20
RRP12	-0.579531	2.29e-24	3.55e-20
TMEM11	-0.579523	2.29e-24	3.55e-20
DPM2	-0.579323	2.4e-24	3.72e-20
STOML2	-0.579282	2.42e-24	3.75e-20
NUDT22	-0.57914	2.5e-24	3.87e-20
TSR3	-0.57914	2.5e-24	3.87e-20
ZNHIT3	-0.578939	2.61e-24	4.05e-20
RPS2	-0.578874	2.65e-24	4.11e-20
PPOX	-0.578803	2.7e-24	4.17e-20
SNHG15	-0.578712	2.75e-24	4.26e-20
RPS6KB2	-0.578664	2.78e-24	4.3e-20
RABL6	-0.578655	2.79e-24	4.31e-20
RPS15	-0.578426	2.93e-24	4.54e-20
MRPL9	-0.578202	3.08e-24	4.77e-20
ILKAP	-0.578186	3.09e-24	4.79e-20
GTPBP3	-0.57791	3.29e-24	5.09e-20
FLYWCH2	-0.577705	3.44e-24	5.33e-20
RNF181	-0.577381	3.7e-24	5.72e-20
SEC13	-0.577345	3.73e-24	5.77e-20
KCTD13	-0.577096	3.94e-24	6.1e-20
TBL3	-0.577094	3.94e-24	6.1e-20
RPL35	-0.576937	4.08e-24	6.31e-20
KAT2A	-0.576867	4.14e-24	6.41e-20
ZNF524	-0.576546	4.45e-24	6.89e-20
ERAL1	-0.576456	4.54e-24	7.02e-20
YDJC	-0.576417	4.58e-24	7.09e-20
NDUFS3	-0.576308	4.69e-24	7.26e-20
IP6K2	-0.576183	4.82e-24	7.46e-20
FPGS	-0.575503	5.6e-24	8.67e-20
TMEM205	-0.575345	5.8e-24	8.97e-20
AHSA1	-0.575239	5.93e-24	9.19e-20
IMMP1L	-0.575193	5.99e-24	9.28e-20
ARL16	-0.575118	6.09e-24	9.43e-20
C8ORF59	-0.575113	6.1e-24	9.45e-20
CDKN2AIPNL	-0.57485	6.46e-24	1e-19
CFAP65	-0.574518	6.95e-24	1.08e-19
NABP2	-0.574249	7.37e-24	1.14e-19
PHKG2	-0.573942	7.89e-24	1.22e-19
MRPL36	-0.573809	8.12e-24	1.26e-19
BCS1L	-0.573776	8.18e-24	1.27e-19
NDOR1	-0.573641	8.43e-24	1.3e-19
DDX54	-0.573434	8.81e-24	1.36e-19
SIRT7	-0.573426	8.83e-24	1.37e-19
UBA52	-0.573406	8.87e-24	1.37e-19
DNLZ	-0.573237	9.2e-24	1.42e-19
USE1	-0.573202	9.27e-24	1.44e-19
SAFB	-0.573147	9.39e-24	1.45e-19
RPL24	-0.573117	9.45e-24	1.46e-19
CPTP	-0.573028	9.63e-24	1.49e-19
RABGGTA	-0.572925	9.85e-24	1.53e-19
WBP1	-0.572907	9.89e-24	1.53e-19
SNU13	-0.572872	9.97e-24	1.54e-19
CCDC51	-0.572629	1.05e-23	1.63e-19
TUT1	-0.5726	1.06e-23	1.64e-19
SLC35C2	-0.572256	1.14e-23	1.77e-19
U2AF1	-0.572097	1.18e-23	1.83e-19
SS18L2	-0.572089	1.18e-23	1.83e-19
SOD1	-0.572056	1.19e-23	1.84e-19
MCTS1	-0.572004	1.2e-23	1.87e-19
QTRT1	-0.571714	1.28e-23	1.99e-19
ANKRD54	-0.571701	1.29e-23	1.99e-19
SCNM1	-0.571554	1.33e-23	2.06e-19
TNIP2	-0.571299	1.4e-23	2.17e-19
COQ4	-0.571138	1.45e-23	2.25e-19
DECR2	-0.571138	1.45e-23	2.25e-19
ZNF768	-0.571095	1.47e-23	2.27e-19
ETV2	-0.570968	1.51e-23	2.34e-19
BRF1	-0.570889	1.53e-23	2.38e-19
LRFN1	-0.570857	1.54e-23	2.39e-19
RPL27A	-0.570844	1.55e-23	2.4e-19
MED8	-0.570671	1.61e-23	2.49e-19
RPSA	-0.570459	1.68e-23	2.61e-19
LEMD2	-0.570346	1.73e-23	2.67e-19
THOC6	-0.570153	1.8e-23	2.79e-19
SHARPIN	-0.570117	1.81e-23	2.81e-19
TPRKB	-0.569981	1.87e-23	2.89e-19
MAD2L2	-0.569949	1.88e-23	2.91e-19
WDR18	-0.569853	1.92e-23	2.97e-19
ASNA1	-0.569776	1.95e-23	3.02e-19
MRPL21	-0.569713	1.98e-23	3.06e-19
PTDSS2	-0.569622	2.02e-23	3.13e-19
MED19	-0.569597	2.03e-23	3.14e-19
NAP1L4	-0.569531	2.06e-23	3.19e-19
C14ORF79	-0.569485	2.08e-23	3.22e-19
FOXRED1	-0.569374	2.13e-23	3.3e-19
BOLA1	-0.569296	2.17e-23	3.35e-19
IDH3G	-0.569166	2.23e-23	3.45e-19
JMJD4	-0.569161	2.23e-23	3.45e-19
PTOV1	-0.56895	2.33e-23	3.61e-19
MRPL38	-0.568853	2.38e-23	3.69e-19
HAGHL	-0.568714	2.45e-23	3.8e-19
YIPF2	-0.568654	2.49e-23	3.85e-19
PDRG1	-0.56865	2.49e-23	3.85e-19
BCCIP	-0.568579	2.53e-23	3.91e-19
SOX12	-0.568536	2.55e-23	3.95e-19
NOXA1	-0.568457	2.59e-23	4.02e-19
GAR1	-0.568292	2.69e-23	4.16e-19
RPL29	-0.568271	2.7e-23	4.18e-19
ZNHIT1	-0.567817	2.98e-23	4.61e-19
TMEM161A	-0.567736	3.03e-23	4.69e-19
PSMG4	-0.567703	3.05e-23	4.72e-19
NFKBIL1	-0.567677	3.07e-23	4.75e-19
C16ORF91	-0.567585	3.13e-23	4.84e-19
SCAF1	-0.567577	3.13e-23	4.85e-19
RFNG	-0.56753	3.17e-23	4.9e-19
RTKN	-0.567506	3.18e-23	4.93e-19
POLR2J	-0.56746	3.21e-23	4.98e-19
NUDT14	-0.567395	3.26e-23	5.05e-19
NDUFA6	-0.567347	3.29e-23	5.1e-19
APOPT1	-0.566862	3.65e-23	5.66e-19
C12ORF45	-0.566687	3.79e-23	5.87e-19
GRINA	-0.566423	4.01e-23	6.21e-19
CPSF3	-0.566357	4.07e-23	6.3e-19
SSNA1	-0.566289	4.13e-23	6.39e-19
RPLP2	-0.566213	4.2e-23	6.5e-19
TSTA3	-0.565804	4.58e-23	7.09e-19
MRPL55	-0.565722	4.66e-23	7.21e-19
DUS1L	-0.565665	4.71e-23	7.3e-19
MRPS25	-0.565649	4.73e-23	7.33e-19
C19ORF53	-0.565438	4.95e-23	7.66e-19
RPSAP58	-0.565066	5.36e-23	8.29e-19
MRPS2	-0.564954	5.49e-23	8.49e-19
MAP2K2	-0.564645	5.86e-23	9.07e-19
TK1	-0.564629	5.88e-23	9.1e-19
PMVK	-0.564586	5.93e-23	9.19e-19
PDCD2	-0.564356	6.23e-23	9.64e-19
RAB25	-0.56426	6.36e-23	9.84e-19
IRF7	-0.564229	6.4e-23	9.91e-19
NECAB3	-0.564056	6.64e-23	1.03e-18
NOL10	-0.564036	6.67e-23	1.03e-18
METTL23	-0.563898	6.86e-23	1.06e-18
TMEM160	-0.563736	7.1e-23	1.1e-18
WDR34	-0.563686	7.18e-23	1.11e-18
GCDH	-0.563579	7.34e-23	1.14e-18
VARS	-0.563569	7.36e-23	1.14e-18
NDUFB3	-0.563435	7.57e-23	1.17e-18
ZNF692	-0.563392	7.64e-23	1.18e-18
UCKL1	-0.563328	7.74e-23	1.2e-18
PRR19	-0.563056	8.2e-23	1.27e-18
ECHS1	-0.563018	8.27e-23	1.28e-18
RPL18	-0.562945	8.39e-23	1.3e-18
PRR34-AS1	-0.562757	8.73e-23	1.35e-18
STK32C	-0.56259	9.05e-23	1.4e-18
TBCD	-0.562584	9.06e-23	1.4e-18
PUS1	-0.562574	9.08e-23	1.41e-18
RER1	-0.562303	9.61e-23	1.49e-18
SLC27A4	-0.562182	9.86e-23	1.53e-18
WDR46	-0.562177	9.87e-23	1.53e-18
APOA1BP	-0.561893	1.05e-22	1.62e-18
SERF2	-0.561591	1.12e-22	1.73e-18
ISOC2	-0.56152	1.13e-22	1.75e-18
PSMC5	-0.561121	1.23e-22	1.91e-18
CLTA	-0.560806	1.32e-22	2.04e-18
GPAA1	-0.560727	1.34e-22	2.07e-18
LRRC56	-0.560658	1.36e-22	2.1e-18
NAPA	-0.560611	1.37e-22	2.12e-18
TMEM54	-0.56061	1.37e-22	2.12e-18
APTX	-0.560574	1.38e-22	2.14e-18
PSMD9	-0.560574	1.38e-22	2.14e-18
C20ORF24	-0.560548	1.39e-22	2.15e-18
GGCT	-0.560207	1.49e-22	2.31e-18
C19ORF43	-0.560141	1.51e-22	2.34e-18
CAPNS1	-0.560122	1.52e-22	2.35e-18
BNIP1	-0.559838	1.61e-22	2.5e-18
RPF2	-0.559662	1.67e-22	2.59e-18
POMP	-0.559645	1.68e-22	2.6e-18
LOC388955	-0.559562	1.71e-22	2.64e-18
RPL27	-0.559529	1.72e-22	2.66e-18
VARS2	-0.559411	1.76e-22	2.73e-18
CCDC124	-0.559344	1.79e-22	2.77e-18
WRAP73	-0.559212	1.84e-22	2.84e-18
KDF1	-0.559197	1.84e-22	2.85e-18
PIDD1	-0.559193	1.84e-22	2.86e-18
ATP6V1F	-0.55911	1.88e-22	2.9e-18
E2F1	-0.559022	1.91e-22	2.96e-18
HIGD2A	-0.558853	1.98e-22	3.06e-18
FAM110A	-0.558676	2.05e-22	3.18e-18
DNAJC4	-0.558499	2.13e-22	3.3e-18
NDUFA11	-0.558334	2.2e-22	3.41e-18
C21ORF59	-0.558319	2.21e-22	3.42e-18
NDUFC1	-0.558293	2.22e-22	3.44e-18
TMEM175	-0.558285	2.23e-22	3.45e-18
RPL32	-0.558041	2.34e-22	3.63e-18
ATP13A1	-0.557981	2.37e-22	3.67e-18
RPL30	-0.557949	2.39e-22	3.7e-18
R3HDM4	-0.557555	2.59e-22	4.01e-18
C19ORF25	-0.557525	2.61e-22	4.04e-18
PPCDC	-0.557237	2.77e-22	4.29e-18
TM7SF2	-0.557151	2.82e-22	4.36e-18
STX10	-0.556805	3.03e-22	4.69e-18
PTMA	-0.556796	3.03e-22	4.7e-18
CERS4	-0.556478	3.24e-22	5.01e-18
ATPAF2	-0.556447	3.26e-22	5.05e-18
AP2S1	-0.556354	3.32e-22	5.15e-18
NDUFB6	-0.556336	3.33e-22	5.16e-18
UQCR10	-0.556269	3.38e-22	5.24e-18
ECE2	-0.556258	3.39e-22	5.25e-18
SURF6	-0.55616	3.46e-22	5.35e-18
ARFGAP1	-0.55614	3.47e-22	5.38e-18
EMC6	-0.556121	3.49e-22	5.4e-18
BRI3	-0.556062	3.53e-22	5.46e-18
TPRA1	-0.556045	3.54e-22	5.48e-18
NAA60	-0.556043	3.54e-22	5.49e-18
ABCB6	-0.556011	3.57e-22	5.52e-18
C11ORF80	-0.555937	3.62e-22	5.61e-18
SRRM2-AS1	-0.555664	3.83e-22	5.93e-18
PUSL1	-0.555096	4.3e-22	6.67e-18
TMEM9	-0.555026	4.37e-22	6.76e-18
PFKL	-0.555009	4.38e-22	6.79e-18
RPS13	-0.554956	4.43e-22	6.86e-18
MRPS9	-0.554851	4.53e-22	7.01e-18
RPA3	-0.554748	4.62e-22	7.16e-18
B9D1	-0.554653	4.71e-22	7.3e-18
ADCK5	-0.554601	4.77e-22	7.38e-18
SLBP	-0.554518	4.85e-22	7.51e-18
DPCD	-0.554409	4.96e-22	7.68e-18
ERMARD	-0.554367	5e-22	7.74e-18
TIMM44	-0.55406	5.33e-22	8.25e-18
ANAPC5	-0.553978	5.41e-22	8.39e-18
MRPL51	-0.553917	5.48e-22	8.49e-18
FAAP20	-0.553913	5.49e-22	8.5e-18
FIZ1	-0.553906	5.49e-22	8.51e-18
SLC2A4RG	-0.553901	5.5e-22	8.52e-18
KRT18	-0.553897	5.51e-22	8.53e-18
RPS16	-0.553724	5.7e-22	8.83e-18
BRICD5	-0.553342	6.17e-22	9.55e-18
PRR7	-0.553301	6.22e-22	9.63e-18
RPS7	-0.553108	6.47e-22	1e-17
BAP1	-0.553017	6.59e-22	1.02e-17
PRPF31	-0.552905	6.74e-22	1.04e-17
ZNF497	-0.552772	6.93e-22	1.07e-17
PPP2R2D	-0.552701	7.03e-22	1.09e-17
CDK4	-0.552444	7.41e-22	1.15e-17
MRPL2	-0.552254	7.7e-22	1.19e-17
RPS11	-0.552209	7.77e-22	1.2e-17
LYPLA2	-0.552198	7.79e-22	1.21e-17
FAM234A	-0.552149	7.87e-22	1.22e-17
ELOF1	-0.552141	7.88e-22	1.22e-17
MPG	-0.55209	7.96e-22	1.23e-17
ATAD3B	-0.552053	8.02e-22	1.24e-17
SMCO4	-0.552033	8.05e-22	1.25e-17
BORCS8	-0.552028	8.06e-22	1.25e-17
ALG3	-0.551743	8.54e-22	1.32e-17
GPI	-0.551726	8.57e-22	1.33e-17
RPL36	-0.551597	8.8e-22	1.36e-17
NEDD8	-0.551579	8.83e-22	1.37e-17
PMF1	-0.551566	8.86e-22	1.37e-17
GUK1	-0.55151	8.96e-22	1.39e-17
UBE2I	-0.551484	9.01e-22	1.39e-17
PRMT1	-0.551337	9.28e-22	1.44e-17
ZNF814	-0.551269	9.41e-22	1.46e-17
NDUFV1	-0.550888	1.02e-21	1.57e-17
THOC7	-0.550833	1.03e-21	1.59e-17
SIRT6	-0.550795	1.04e-21	1.6e-17
IGSF8	-0.55076	1.04e-21	1.61e-17
RBM10	-0.550695	1.06e-21	1.64e-17
EXOSC7	-0.550494	1.1e-21	1.7e-17
ATP5G3	-0.550491	1.1e-21	1.71e-17
DGAT1	-0.550232	1.16e-21	1.8e-17
AGAP3	-0.55008	1.2e-21	1.85e-17
TRAF2	-0.550025	1.21e-21	1.87e-17
RPL14	-0.54981	1.26e-21	1.96e-17
POLR2E	-0.549781	1.27e-21	1.97e-17
LOC93622	-0.549438	1.36e-21	2.11e-17
RPS29	-0.549421	1.37e-21	2.12e-17
CLPTM1L	-0.54933	1.39e-21	2.16e-17
ACY1	-0.549156	1.44e-21	2.23e-17
C19ORF60	-0.549144	1.45e-21	2.24e-17
MRPS24	-0.549066	1.47e-21	2.27e-17
HINT2	-0.549031	1.48e-21	2.29e-17
UCN	-0.548995	1.49e-21	2.31e-17
FAM207A	-0.548985	1.49e-21	2.31e-17
MYEOV2	-0.548944	1.5e-21	2.33e-17
RPF1	-0.548919	1.51e-21	2.34e-17
TEN1	-0.548841	1.54e-21	2.38e-17
MRPL40	-0.548739	1.57e-21	2.43e-17
RPS10	-0.548645	1.6e-21	2.47e-17
OTUB1	-0.54844	1.67e-21	2.58e-17
MRPL28	-0.548365	1.69e-21	2.62e-17
CYB561D2	-0.548335	1.7e-21	2.63e-17
FH	-0.548288	1.72e-21	2.66e-17
SELO	-0.54805	1.8e-21	2.79e-17
CCDC12	-0.548042	1.8e-21	2.79e-17
SWSAP1	-0.548018	1.81e-21	2.81e-17
TSEN54	-0.547862	1.87e-21	2.9e-17
PLPPR2	-0.547804	1.89e-21	2.93e-17
NARF	-0.547549	1.99e-21	3.08e-17
ZNF446	-0.54751	2.01e-21	3.11e-17
TBCB	-0.547487	2.02e-21	3.12e-17
TRAIP	-0.547342	2.08e-21	3.21e-17
MBD3	-0.547341	2.08e-21	3.22e-17
SMIM7	-0.547334	2.08e-21	3.22e-17
COMMD7	-0.547223	2.13e-21	3.29e-17
FAU	-0.547185	2.14e-21	3.32e-17
YBEY	-0.547166	2.15e-21	3.33e-17
ILF2	-0.547091	2.18e-21	3.38e-17
IAH1	-0.547065	2.19e-21	3.4e-17
DNAJB11	-0.546733	2.34e-21	3.63e-17
SLC39A3	-0.546583	2.42e-21	3.74e-17
MANF	-0.546404	2.5e-21	3.88e-17
RABEP2	-0.546286	2.56e-21	3.97e-17
GNL3	-0.545835	2.81e-21	4.34e-17
SART1	-0.545797	2.83e-21	4.38e-17
RPS21	-0.54552	2.99e-21	4.63e-17
ECI2	-0.545435	3.04e-21	4.7e-17
PTTG1	-0.545291	3.13e-21	4.84e-17
NPRL3	-0.545147	3.22e-21	4.98e-17
LAMTOR4	-0.544988	3.32e-21	5.14e-17
GNB2	-0.544876	3.39e-21	5.26e-17
DPH7	-0.544602	3.58e-21	5.55e-17
TMEM234	-0.544576	3.6e-21	5.58e-17
LSM2	-0.544229	3.86e-21	5.98e-17
PRR5	-0.544166	3.91e-21	6.05e-17
CCDC167	-0.54396	4.07e-21	6.3e-17
CEP131	-0.54394	4.09e-21	6.33e-17
ADPRHL2	-0.543833	4.17e-21	6.46e-17
APOO	-0.543774	4.22e-21	6.54e-17
CPT1B	-0.543601	4.37e-21	6.77e-17
FUNDC1	-0.543505	4.46e-21	6.9e-17
NACA	-0.543479	4.48e-21	6.93e-17
UCK1	-0.543386	4.56e-21	7.06e-17
TBC1D7	-0.543313	4.63e-21	7.16e-17
EMC3	-0.543215	4.72e-21	7.31e-17
DXO	-0.543206	4.73e-21	7.32e-17
ZNF771	-0.543176	4.75e-21	7.36e-17
MAGOH	-0.543018	4.91e-21	7.6e-17
CDK5RAP1	-0.542966	4.96e-21	7.67e-17
CAMSAP3	-0.542798	5.12e-21	7.93e-17
NME4	-0.542721	5.2e-21	8.05e-17
SNRNP35	-0.542599	5.33e-21	8.25e-17
CRELD2	-0.542553	5.38e-21	8.32e-17
STYXL1	-0.54251	5.42e-21	8.4e-17
SNRNP70	-0.54242	5.52e-21	8.55e-17
SLC25A19	-0.542392	5.55e-21	8.59e-17
RNF149	-0.542127	5.85e-21	9.05e-17
RPS15A	-0.54194	6.07e-21	9.39e-17
EIF2B3	-0.541919	6.09e-21	9.43e-17
PYCR1	-0.541834	6.19e-21	9.59e-17
RPL39	-0.541795	6.24e-21	9.66e-17
INO80E	-0.541789	6.25e-21	9.68e-17
BIRC5	-0.541448	6.68e-21	1.03e-16
RPL4	-0.54138	6.77e-21	1.05e-16
OXSM	-0.541331	6.84e-21	1.06e-16
LIN37	-0.54108	7.18e-21	1.11e-16
C1ORF159	-0.540996	7.3e-21	1.13e-16
MAP3K11	-0.540994	7.3e-21	1.13e-16
RABGGTB	-0.540965	7.34e-21	1.14e-16
ALKBH7	-0.540934	7.39e-21	1.14e-16
KPTN	-0.540923	7.41e-21	1.15e-16
CYTH2	-0.540834	7.54e-21	1.17e-16
CYHR1	-0.540724	7.7e-21	1.19e-16
SAP18	-0.540674	7.78e-21	1.2e-16
B4GALT7	-0.540605	7.88e-21	1.22e-16
CPSF3L	-0.540389	8.22e-21	1.27e-16
PPIAL4G	-0.540004	8.87e-21	1.37e-16
SNHG17	-0.539089	1.06e-20	1.64e-16
BCL2L12	-0.538834	1.11e-20	1.72e-16
UQCRBP1	-0.538602	1.17e-20	1.8e-16
LINC00116	-0.538569	1.17e-20	1.82e-16
BRIX1	-0.538469	1.2e-20	1.85e-16
SCO2	-0.538367	1.22e-20	1.89e-16
YWHAE	-0.538175	1.27e-20	1.96e-16
IMP3	-0.537951	1.32e-20	2.05e-16
MPST	-0.537878	1.34e-20	2.08e-16
LSM8	-0.537803	1.36e-20	2.11e-16
RPAIN	-0.537719	1.38e-20	2.14e-16
FIS1	-0.537707	1.39e-20	2.15e-16
LONP1	-0.537591	1.42e-20	2.2e-16
UBL4A	-0.537543	1.43e-20	2.22e-16
TSSC4	-0.537491	1.45e-20	2.24e-16
AIMP2	-0.537477	1.45e-20	2.24e-16
RPL8	-0.537358	1.48e-20	2.3e-16
PKN1	-0.537285	1.5e-20	2.33e-16
ZNF653	-0.537209	1.53e-20	2.36e-16
LENG1	-0.537125	1.55e-20	2.4e-16
RPS19	-0.537043	1.58e-20	2.44e-16
PPP2R3B	-0.5369	1.62e-20	2.51e-16
ARRDC1	-0.53687	1.63e-20	2.52e-16
RPLP0	-0.536792	1.66e-20	2.56e-16
UBE2T	-0.53668	1.69e-20	2.62e-16
TRMT1	-0.536678	1.69e-20	2.62e-16
SIRT3	-0.536604	1.72e-20	2.66e-16
WDR77	-0.536514	1.75e-20	2.7e-16
KEAP1	-0.53651	1.75e-20	2.71e-16
GRHPR	-0.536209	1.85e-20	2.87e-16
CLDN3	-0.536162	1.87e-20	2.89e-16
MFSD12	-0.535972	1.94e-20	3e-16
GLI4	-0.535952	1.95e-20	3.01e-16
UBAC2	-0.535928	1.96e-20	3.03e-16
WDR45	-0.535913	1.96e-20	3.04e-16
TRAPPC5	-0.535829	1.99e-20	3.09e-16
TRAP1	-0.535672	2.05e-20	3.18e-16
LMNTD2	-0.535628	2.07e-20	3.21e-16
POLRMT	-0.53562	2.08e-20	3.21e-16
SNHG10	-0.535512	2.12e-20	3.28e-16
GRK6	-0.535329	2.19e-20	3.4e-16
P2RY11	-0.535329	2.19e-20	3.4e-16
COPZ1	-0.535323	2.2e-20	3.4e-16
GLRX3	-0.535145	2.27e-20	3.52e-16
RPS4Y1	-0.535112	2.29e-20	3.54e-16
EIF5A	-0.534995	2.34e-20	3.62e-16
NDUFS5	-0.534898	2.38e-20	3.69e-16
ARHGAP8	-0.534856	2.4e-20	3.72e-16
RP9	-0.53475	2.45e-20	3.8e-16
APEH	-0.534643	2.5e-20	3.88e-16
NME1-NME2	-0.534467	2.59e-20	4.01e-16
SMYD5	-0.534328	2.66e-20	4.12e-16
FAM32A	-0.534314	2.67e-20	4.13e-16
CDC34	-0.534293	2.68e-20	4.15e-16
FBXO22-AS1	-0.534212	2.72e-20	4.21e-16
KDELR1	-0.534025	2.82e-20	4.37e-16
TBC1D10B	-0.533826	2.93e-20	4.54e-16
ALKBH6	-0.53343	3.16e-20	4.89e-16
SLC25A38	-0.533379	3.19e-20	4.94e-16
LOC143666	-0.533042	3.4e-20	5.27e-16
MED27	-0.532999	3.43e-20	5.31e-16
RPS8	-0.532853	3.53e-20	5.46e-16
RPL13A	-0.532769	3.58e-20	5.55e-16
PYM1	-0.53266	3.66e-20	5.67e-16
HOMER3	-0.532379	3.86e-20	5.98e-16
PHB	-0.532368	3.87e-20	5.99e-16
ATP5J	-0.53235	3.88e-20	6.01e-16
SMARCB1	-0.532226	3.98e-20	6.16e-16
FDX1L	-0.531941	4.2e-20	6.5e-16
SNX22	-0.531919	4.21e-20	6.53e-16
TMEM52	-0.531688	4.4e-20	6.82e-16
TMEM179B	-0.531593	4.48e-20	6.94e-16
PWP2	-0.53145	4.61e-20	7.13e-16
RPSAP9	-0.531402	4.65e-20	7.2e-16
TIMM9	-0.531348	4.7e-20	7.27e-16
STK25	-0.531313	4.73e-20	7.32e-16
SLX1B	-0.531044	4.98e-20	7.71e-16
WBSCR16	-0.531041	4.98e-20	7.71e-16
SLC2A8	-0.530981	5.04e-20	7.8e-16
SLC9A3R2	-0.530902	5.11e-20	7.92e-16
TREX1	-0.53086	5.15e-20	7.98e-16
NT5C3B	-0.530845	5.17e-20	8e-16
CHCHD5	-0.530832	5.18e-20	8.02e-16
RAB17	-0.530822	5.19e-20	8.04e-16
KXD1	-0.530769	5.24e-20	8.12e-16
CBY1	-0.530763	5.25e-20	8.13e-16
AGPAT2	-0.530656	5.36e-20	8.3e-16
NPDC1	-0.530513	5.5e-20	8.52e-16
ECH1	-0.530411	5.61e-20	8.69e-16
XAB2	-0.530247	5.79e-20	8.96e-16
PPP2R1A	-0.530094	5.96e-20	9.23e-16
SLC25A6	-0.530017	6.05e-20	9.36e-16
PFDN4	-0.530006	6.06e-20	9.38e-16
PITHD1	-0.529962	6.11e-20	9.46e-16
PDZD11	-0.529944	6.13e-20	9.49e-16
RNF187	-0.529599	6.54e-20	1.01e-15
AP4M1	-0.529543	6.61e-20	1.02e-15
C8ORF76	-0.529475	6.7e-20	1.04e-15
HMGN2	-0.529407	6.78e-20	1.05e-15
TXN2	-0.529374	6.83e-20	1.06e-15
TACO1	-0.529299	6.92e-20	1.07e-15
MOSPD3	-0.529229	7.02e-20	1.09e-15
SNRPB2	-0.529191	7.07e-20	1.09e-15
LRSAM1	-0.529189	7.07e-20	1.09e-15
FEN1	-0.528955	7.39e-20	1.14e-15
MZT2A	-0.528919	7.44e-20	1.15e-15
DHRS11	-0.528833	7.56e-20	1.17e-15
MPLKIP	-0.528795	7.61e-20	1.18e-15
TIMM8A	-0.528762	7.66e-20	1.19e-15
EPN1	-0.52876	7.66e-20	1.19e-15
HDAC8	-0.528619	7.87e-20	1.22e-15
CIRBP-AS1	-0.528384	8.22e-20	1.27e-15
DGCR6L	-0.528373	8.24e-20	1.28e-15
TRMT61A	-0.528262	8.42e-20	1.3e-15
BCAP31	-0.528069	8.73e-20	1.35e-15
EMC9	-0.527831	9.13e-20	1.41e-15
ZNF837	-0.527719	9.32e-20	1.44e-15
KLHL17	-0.527654	9.43e-20	1.46e-15
EMD	-0.527583	9.56e-20	1.48e-15
ATP5E	-0.527568	9.59e-20	1.48e-15
DGCR6	-0.527406	9.88e-20	1.53e-15
MBOAT7	-0.527369	9.95e-20	1.54e-15
FAM69B	-0.527288	1.01e-19	1.56e-15
RPL35A	-0.527167	1.03e-19	1.6e-15
EME1	-0.527139	1.04e-19	1.61e-15
ZNF205	-0.527061	1.05e-19	1.63e-15
ANAPC15	-0.527051	1.06e-19	1.64e-15
COMMD3	-0.527028	1.06e-19	1.64e-15
GTF2A2	-0.526931	1.08e-19	1.67e-15
TRAPPC6A	-0.526896	1.09e-19	1.68e-15
MPC2	-0.526654	1.14e-19	1.76e-15
TSTD1	-0.526565	1.16e-19	1.79e-15
SPRN	-0.526556	1.16e-19	1.79e-15
DOHH	-0.526543	1.16e-19	1.8e-15
KIF22	-0.526519	1.17e-19	1.81e-15
COMMD1	-0.526431	1.19e-19	1.84e-15
MPND	-0.52632	1.21e-19	1.88e-15
SDHAF2	-0.526264	1.22e-19	1.89e-15
TMUB1	-0.526222	1.23e-19	1.91e-15
PPP1R16A	-0.526151	1.25e-19	1.94e-15
SSBP4	-0.525993	1.29e-19	1.99e-15
NELFB	-0.52561	1.38e-19	2.14e-15
TUBB4B	-0.525256	1.48e-19	2.29e-15
FN3K	-0.525243	1.48e-19	2.29e-15
MYDGF	-0.52522	1.49e-19	2.3e-15
COA5	-0.524965	1.56e-19	2.41e-15
HSF1	-0.524919	1.57e-19	2.43e-15
ABCF3	-0.524795	1.61e-19	2.49e-15
SDHB	-0.524728	1.63e-19	2.52e-15
TMEM115	-0.524586	1.67e-19	2.59e-15
ZNF414	-0.524435	1.72e-19	2.66e-15
PSMC1	-0.524426	1.72e-19	2.67e-15
C6ORF203	-0.524136	1.82e-19	2.82e-15
EIF6	-0.52413	1.82e-19	2.82e-15
SWI5	-0.524034	1.85e-19	2.87e-15
ZFAND2B	-0.523931	1.89e-19	2.92e-15
NOC4L	-0.523752	1.95e-19	3.02e-15
SMUG1	-0.523723	1.96e-19	3.04e-15
PPIE	-0.523686	1.98e-19	3.06e-15
FAM58A	-0.523636	1.99e-19	3.09e-15
SLC25A45	-0.523585	2.01e-19	3.12e-15
C4ORF27	-0.523443	2.07e-19	3.2e-15
ICAM3	-0.523155	2.18e-19	3.38e-15
SLC35B1	-0.523134	2.19e-19	3.39e-15
KLF16	-0.523067	2.22e-19	3.43e-15
DNAJC30	-0.523052	2.22e-19	3.44e-15
RPL18A	-0.52299	2.25e-19	3.48e-15
ADRBK1	-0.522983	2.25e-19	3.48e-15
DUSP28	-0.522955	2.26e-19	3.5e-15
HPCAL1	-0.522807	2.32e-19	3.6e-15
PRRG2	-0.522765	2.34e-19	3.63e-15
KLHDC9	-0.52253	2.45e-19	3.79e-15
RPL34	-0.522469	2.47e-19	3.83e-15
SMIM1	-0.522432	2.49e-19	3.86e-15
BRMS1	-0.522395	2.51e-19	3.88e-15
RPS3	-0.522315	2.55e-19	3.94e-15
CCS	-0.522251	2.58e-19	3.99e-15
YKT6	-0.522246	2.58e-19	3.99e-15
CRB3	-0.522184	2.61e-19	4.04e-15
RPL23	-0.52214	2.63e-19	4.07e-15
ULK3	-0.521793	2.8e-19	4.34e-15
RGS10	-0.521613	2.9e-19	4.49e-15
HIST2H2AC	-0.521531	2.94e-19	4.55e-15
RBCK1	-0.521522	2.95e-19	4.56e-15
PRR22	-0.521491	2.96e-19	4.59e-15
PARVB	-0.521339	3.05e-19	4.72e-15
RNF220	-0.521253	3.09e-19	4.79e-15
C12ORF10	-0.521229	3.11e-19	4.81e-15
MEN1	-0.521199	3.13e-19	4.84e-15
DNAJC19	-0.52113	3.17e-19	4.9e-15
CIB1	-0.521	3.24e-19	5.02e-15
MLF2	-0.520843	3.34e-19	5.17e-15
COX7C	-0.520744	3.4e-19	5.26e-15
ATG4B	-0.520674	3.44e-19	5.33e-15
RPP38	-0.520662	3.45e-19	5.34e-15
HNRNPC	-0.520576	3.5e-19	5.43e-15
STX19	-0.520201	3.75e-19	5.81e-15
LRP3	-0.52016	3.78e-19	5.86e-15
TMEM223	-0.520123	3.81e-19	5.9e-15
CDC37	-0.520003	3.89e-19	6.03e-15
DMAP1	-0.51988	3.98e-19	6.16e-15
NTHL1	-0.519604	4.19e-19	6.48e-15
RPP25L	-0.519352	4.38e-19	6.79e-15
EIF2B1	-0.519078	4.61e-19	7.14e-15
MCUR1	-0.519036	4.64e-19	7.19e-15
CLCN7	-0.519018	4.66e-19	7.21e-15
RPL23A	-0.518866	4.79e-19	7.42e-15
PIH1D1	-0.518736	4.9e-19	7.59e-15
CCDC137	-0.518725	4.91e-19	7.61e-15
ACAD9	-0.518492	5.13e-19	7.94e-15
OCIAD2	-0.518488	5.13e-19	7.95e-15
TMEM259	-0.518475	5.14e-19	7.96e-15
MGC72080	-0.518402	5.21e-19	8.07e-15
NSUN5P1	-0.518312	5.3e-19	8.2e-15
THAP3	-0.518067	5.54e-19	8.58e-15
CXORF40A	-0.518063	5.54e-19	8.58e-15
TRIM27	-0.518011	5.6e-19	8.67e-15
ACOT7	-0.517893	5.72e-19	8.85e-15
WDR83OS	-0.517848	5.76e-19	8.93e-15
HSPB11	-0.517796	5.82e-19	9.01e-15
MGAT4B	-0.517623	6e-19	9.3e-15
SLC19A1	-0.517561	6.07e-19	9.4e-15
STXBP2	-0.517483	6.16e-19	9.54e-15
RGS11	-0.51733	6.33e-19	9.81e-15
ARFRP1	-0.517285	6.38e-19	9.89e-15
MGST2	-0.517163	6.53e-19	1.01e-14
RRP7A	-0.51716	6.53e-19	1.01e-14
DNAJB2	-0.517157	6.53e-19	1.01e-14
PIGY	-0.517128	6.57e-19	1.02e-14
QARS	-0.516875	6.88e-19	1.06e-14
HDGF	-0.516696	7.1e-19	1.1e-14
HES6	-0.516425	7.46e-19	1.16e-14
LYRM4	-0.51621	7.76e-19	1.2e-14
STAP2	-0.516155	7.83e-19	1.21e-14
AARSD1	-0.516038	8e-19	1.24e-14
SGTA	-0.516003	8.05e-19	1.25e-14
GTF3C5	-0.515973	8.09e-19	1.25e-14
IDUA	-0.515948	8.13e-19	1.26e-14
STK11	-0.515779	8.38e-19	1.3e-14
SPSB3	-0.515673	8.54e-19	1.32e-14
MECR	-0.515633	8.61e-19	1.33e-14
SARNP	-0.515613	8.64e-19	1.34e-14
RPS6	-0.515597	8.66e-19	1.34e-14
KMT2E-AS1	-0.515528	8.77e-19	1.36e-14
POP4	-0.515349	9.06e-19	1.4e-14
MRPL17	-0.514991	9.66e-19	1.5e-14
ABHD16B	-0.514732	1.01e-18	1.57e-14
ZNF598	-0.514694	1.02e-18	1.58e-14
MRPL18	-0.514684	1.02e-18	1.58e-14
FAM53A	-0.514682	1.02e-18	1.58e-14
CDK5RAP3	-0.514432	1.07e-18	1.65e-14
ZNF580	-0.51443	1.07e-18	1.65e-14
NDUFA12	-0.514344	1.09e-18	1.68e-14
CENPM	-0.514075	1.14e-18	1.76e-14
FAM3A	-0.514066	1.14e-18	1.77e-14
WDR83	-0.513861	1.18e-18	1.83e-14
GLOD5	-0.513486	1.27e-18	1.96e-14
EEF1E1	-0.513334	1.3e-18	2.01e-14
TRAPPC3	-0.51318	1.34e-18	2.07e-14
RPL31	-0.513139	1.35e-18	2.09e-14
NUDT5	-0.513061	1.37e-18	2.11e-14
WDR24	-0.513011	1.38e-18	2.13e-14
ZNF688	-0.512806	1.43e-18	2.21e-14
PSMC6	-0.512729	1.45e-18	2.24e-14
ENDOG	-0.512606	1.48e-18	2.29e-14
SDF2L1	-0.512602	1.48e-18	2.3e-14
AMDHD2	-0.512523	1.5e-18	2.33e-14
MAEA	-0.51252	1.5e-18	2.33e-14
CLDN7	-0.512501	1.51e-18	2.34e-14
DYNLRB1	-0.512433	1.53e-18	2.37e-14
FKBP4	-0.512314	1.56e-18	2.42e-14
SHC2	-0.51222	1.59e-18	2.46e-14
PSMA4	-0.512145	1.61e-18	2.49e-14
CARS2	-0.511927	1.67e-18	2.59e-14
PSMA1	-0.511906	1.68e-18	2.6e-14
DIABLO	-0.511783	1.72e-18	2.66e-14
NPEPL1	-0.511643	1.76e-18	2.72e-14
TMEM203	-0.511352	1.85e-18	2.87e-14
LRWD1	-0.511287	1.87e-18	2.9e-14
MRPL52	-0.511217	1.9e-18	2.94e-14
NUPR1	-0.511213	1.9e-18	2.94e-14
PPA2	-0.511115	1.93e-18	2.99e-14
APRT	-0.511026	1.96e-18	3.04e-14
JAGN1	-0.511005	1.97e-18	3.05e-14
HGS	-0.510651	2.1e-18	3.25e-14
PREB	-0.510594	2.12e-18	3.28e-14
RITA1	-0.510575	2.13e-18	3.29e-14
NAA38	-0.510542	2.14e-18	3.31e-14
ZNF622	-0.510449	2.17e-18	3.37e-14
PARL	-0.510421	2.18e-18	3.38e-14
GTF2H5	-0.510218	2.26e-18	3.51e-14
CSK	-0.509969	2.37e-18	3.67e-14
FAAH	-0.509764	2.45e-18	3.8e-14
SERGEF	-0.509649	2.5e-18	3.88e-14
EIF2S2	-0.50956	2.54e-18	3.94e-14
CALR	-0.509553	2.55e-18	3.95e-14
FOXH1	-0.509537	2.55e-18	3.96e-14
HSD11B1L	-0.509475	2.58e-18	4e-14
AXIN1	-0.509145	2.74e-18	4.24e-14
EMG1	-0.50906	2.78e-18	4.3e-14
ACTR5	-0.509034	2.79e-18	4.32e-14
DYRK1B	-0.508989	2.81e-18	4.36e-14
PPDPF	-0.508984	2.82e-18	4.36e-14
TBCA	-0.50891	2.85e-18	4.42e-14
TACC3	-0.5088	2.91e-18	4.51e-14
ASL	-0.508779	2.92e-18	4.52e-14
RPS14	-0.508744	2.94e-18	4.55e-14
GNB2L1	-0.508651	2.99e-18	4.63e-14
PELP1	-0.508631	3e-18	4.64e-14
NLE1	-0.508565	3.03e-18	4.7e-14
COX16	-0.508459	3.09e-18	4.78e-14
TMSB10	-0.508194	3.24e-18	5.01e-14
ANKRD13D	-0.508101	3.29e-18	5.1e-14
UXT	-0.508089	3.3e-18	5.11e-14
ERH	-0.507901	3.41e-18	5.28e-14
ZNF579	-0.507778	3.48e-18	5.39e-14
PIN1	-0.507677	3.55e-18	5.49e-14
RRP36	-0.507594	3.6e-18	5.57e-14
MINOS1	-0.507536	3.63e-18	5.63e-14
RPS17	-0.507518	3.65e-18	5.65e-14
NSMCE1	-0.507361	3.75e-18	5.8e-14
TRAPPC4	-0.507241	3.83e-18	5.93e-14
EFNA4	-0.507218	3.84e-18	5.95e-14
GAS5	-0.50719	3.86e-18	5.98e-14
METTL5	-0.507141	3.9e-18	6.03e-14
GPX1	-0.507107	3.92e-18	6.07e-14
KNOP1	-0.506945	4.03e-18	6.24e-14
TIMM17A	-0.506889	4.07e-18	6.3e-14
COQ5	-0.506739	4.18e-18	6.47e-14
UBB	-0.506723	4.19e-18	6.49e-14
PRSS8	-0.50658	4.3e-18	6.65e-14
PPP6R2	-0.50657	4.3e-18	6.67e-14
AATF	-0.506552	4.32e-18	6.69e-14
RPS24	-0.506543	4.32e-18	6.7e-14
HDAC10	-0.506529	4.34e-18	6.71e-14
SMDT1	-0.506402	4.43e-18	6.86e-14
NPM3	-0.505943	4.8e-18	7.44e-14
LYAR	-0.505915	4.83e-18	7.47e-14
C1ORF50	-0.505875	4.86e-18	7.53e-14
PCSK4	-0.505856	4.88e-18	7.55e-14
RNF25	-0.505845	4.89e-18	7.57e-14
ALG14	-0.505769	4.95e-18	7.67e-14
IFT43	-0.505741	4.98e-18	7.71e-14
DTD1	-0.505584	5.11e-18	7.92e-14
MRPL54	-0.50533	5.35e-18	8.28e-14
MCRS1	-0.505273	5.4e-18	8.36e-14
PERM1	-0.505171	5.5e-18	8.51e-14
CHKB-AS1	-0.505091	5.57e-18	8.63e-14
KMT5C	-0.505038	5.63e-18	8.71e-14
MTMR14	-0.504949	5.71e-18	8.85e-14
TIGD5	-0.5049	5.76e-18	8.92e-14
EEF1D	-0.504883	5.78e-18	8.95e-14
TYSND1	-0.504707	5.96e-18	9.23e-14
SNF8	-0.504649	6.02e-18	9.32e-14
SPNS1	-0.504622	6.05e-18	9.36e-14
ATPAF1	-0.504611	6.06e-18	9.38e-14
ETFB	-0.504397	6.29e-18	9.74e-14
ZNRD1	-0.504294	6.4e-18	9.91e-14
FKBP2	-0.504166	6.55e-18	1.01e-13
KRTCAP3	-0.504137	6.58e-18	1.02e-13
CHID1	-0.504015	6.72e-18	1.04e-13
TSG101	-0.503995	6.74e-18	1.04e-13
CUEDC2	-0.503945	6.8e-18	1.05e-13
MTIF3	-0.503776	7e-18	1.08e-13
EIF3M	-0.503762	7.02e-18	1.09e-13
NDUFS7	-0.503716	7.08e-18	1.1e-13
ATF4	-0.503412	7.46e-18	1.16e-13
ZNF511	-0.503327	7.57e-18	1.17e-13
TRAPPC12	-0.503204	7.73e-18	1.2e-13
CKS2	-0.502894	8.16e-18	1.26e-13
NGDN	-0.502806	8.28e-18	1.28e-13
MSTO1	-0.502753	8.36e-18	1.29e-13
TAF11	-0.502705	8.43e-18	1.31e-13
DNPEP	-0.502701	8.44e-18	1.31e-13
DEAF1	-0.50241	8.87e-18	1.37e-13
PSMD6	-0.502382	8.91e-18	1.38e-13
ANKRD19P	-0.50231	9.03e-18	1.4e-13
TKFC	-0.502308	9.03e-18	1.4e-13
GLYCTK	-0.502205	9.19e-18	1.42e-13
MGMT	-0.502184	9.22e-18	1.43e-13
NUDC	-0.502056	9.43e-18	1.46e-13
AHCY	-0.501822	9.82e-18	1.52e-13
C8ORF82	-0.501512	1.04e-17	1.6e-13
RPS18	-0.501496	1.04e-17	1.61e-13
OGFR	-0.501164	1.1e-17	1.7e-13
PIN4P1	-0.501058	1.12e-17	1.73e-13
BDH1	-0.500931	1.14e-17	1.77e-13
TSPAN17	-0.500777	1.18e-17	1.82e-13
TXNDC17	-0.500667	1.2e-17	1.85e-13
PEBP1	-0.500558	1.22e-17	1.89e-13
TCTEX1D2	-0.500552	1.22e-17	1.89e-13
ATOX1	-0.500332	1.27e-17	1.96e-13
MLPH	-0.500296	1.28e-17	1.98e-13
DANCR	-0.50021	1.3e-17	2.01e-13
TRAF7	-0.500172	1.3e-17	2.02e-13
SH3GLB2	-0.500107	1.32e-17	2.04e-13
TRIB3	-0.500029	1.34e-17	2.07e-13
KIAA0513	0.500074	1.33e-17	2.05e-13
VPS37A	0.500086	1.32e-17	2.05e-13
GPR135	0.500206	1.3e-17	2.01e-13
P2RY10	0.500287	1.28e-17	1.98e-13
ZBTB21	0.500338	1.27e-17	1.96e-13
DYNC2H1	0.500366	1.26e-17	1.95e-13
SLCO2A1	0.500398	1.25e-17	1.94e-13
S1PR1	0.500414	1.25e-17	1.94e-13
NXPE3	0.500469	1.24e-17	1.92e-13
MARCH1	0.50062	1.21e-17	1.87e-13
ARHGEF2	0.500937	1.14e-17	1.77e-13
TRIM23	0.50101	1.13e-17	1.75e-13
DDIT4L	0.501107	1.11e-17	1.72e-13
KLHL15	0.501131	1.11e-17	1.71e-13
TCEANC2	0.50131	1.07e-17	1.66e-13
BMP3	0.501311	1.07e-17	1.66e-13
LOC728024	0.501369	1.06e-17	1.64e-13
B4GALT1	0.501399	1.06e-17	1.64e-13
WDR82	0.50158	1.02e-17	1.58e-13
TTC17	0.501588	1.02e-17	1.58e-13
ASPH	0.501882	9.72e-18	1.5e-13
ZNF417	0.50189	9.7e-18	1.5e-13
ERN1	0.50197	9.57e-18	1.48e-13
PDK4	0.502006	9.51e-18	1.47e-13
PTPN22	0.502018	9.49e-18	1.47e-13
DDX3X	0.502046	9.45e-18	1.46e-13
SPOP	0.502082	9.39e-18	1.45e-13
TRAPPC8	0.502195	9.21e-18	1.43e-13
SIRT1	0.502206	9.19e-18	1.42e-13
PLEKHM3	0.502242	9.13e-18	1.41e-13
CASQ1	0.502407	8.88e-18	1.37e-13
ETV5	0.50244	8.83e-18	1.37e-13
BCL11B	0.502763	8.35e-18	1.29e-13
RGN	0.502847	8.23e-18	1.27e-13
ARHGAP10	0.502972	8.05e-18	1.25e-13
KLF5	0.503082	7.9e-18	1.22e-13
SLC35G1	0.503142	7.82e-18	1.21e-13
SBSPON	0.503169	7.78e-18	1.2e-13
ABCA9	0.503252	7.67e-18	1.19e-13
ZFP36L2	0.503418	7.45e-18	1.15e-13
CYP27C1	0.503423	7.45e-18	1.15e-13
SCAF11	0.503555	7.28e-18	1.13e-13
SLC2A14	0.503873	6.89e-18	1.07e-13
NLRP1	0.503883	6.88e-18	1.06e-13
ZSCAN25	0.503904	6.85e-18	1.06e-13
ACVR1	0.503963	6.78e-18	1.05e-13
DHX8	0.503987	6.75e-18	1.05e-13
WDR7	0.504069	6.66e-18	1.03e-13
FBXL7	0.504097	6.62e-18	1.03e-13
ANKRD40	0.504141	6.57e-18	1.02e-13
EML1	0.50415	6.56e-18	1.02e-13
PDP2	0.504438	6.24e-18	9.67e-14
HLA-DOA	0.504518	6.16e-18	9.53e-14
LRIG3	0.504541	6.13e-18	9.5e-14
UTP20	0.504607	6.06e-18	9.39e-14
APBB2	0.504748	5.92e-18	9.16e-14
CEP350	0.504766	5.9e-18	9.13e-14
NDP	0.504779	5.88e-18	9.11e-14
CYSLTR2	0.504975	5.69e-18	8.81e-14
ARHGAP35	0.505071	5.59e-18	8.66e-14
RBL1	0.505112	5.55e-18	8.6e-14
ULBP3	0.505141	5.53e-18	8.56e-14
SF3A1	0.505198	5.47e-18	8.47e-14
TLR2	0.505358	5.32e-18	8.24e-14
PARP4	0.505365	5.31e-18	8.23e-14
MSANTD4	0.505585	5.11e-18	7.92e-14
HIF1AN	0.505649	5.06e-18	7.83e-14
PCDHGA10	0.50567	5.04e-18	7.8e-14
CEP135	0.505725	4.99e-18	7.73e-14
CDC42EP4	0.506001	4.75e-18	7.36e-14
NBPF10	0.506026	4.73e-18	7.33e-14
ZKSCAN1	0.50609	4.68e-18	7.25e-14
WFIKKN2	0.50614	4.64e-18	7.19e-14
CXCR2	0.506179	4.61e-18	7.14e-14
UEVLD	0.506193	4.6e-18	7.12e-14
GPR183	0.50627	4.54e-18	7.03e-14
ATP9B	0.50629	4.52e-18	7e-14
PRELID2	0.506342	4.48e-18	6.94e-14
NEO1	0.506388	4.44e-18	6.88e-14
ZNF267	0.506418	4.42e-18	6.85e-14
GLTSCR1L	0.506425	4.42e-18	6.84e-14
ARID5B	0.506442	4.4e-18	6.82e-14
JAM3	0.506447	4.4e-18	6.81e-14
DSC3	0.506608	4.28e-18	6.62e-14
PPP3CB	0.506906	4.06e-18	6.29e-14
CNR1	0.506935	4.04e-18	6.25e-14
NAV3	0.507115	3.91e-18	6.06e-14
FAM129A	0.507142	3.89e-18	6.03e-14
MID2	0.507201	3.85e-18	5.97e-14
STK32B	0.50721	3.85e-18	5.96e-14
FUT11	0.507321	3.77e-18	5.84e-14
HIP1	0.507549	3.63e-18	5.61e-14
ZHX2	0.507651	3.56e-18	5.52e-14
STS	0.50767	3.55e-18	5.5e-14
IL7	0.508147	3.26e-18	5.05e-14
VCAM1	0.508351	3.15e-18	4.88e-14
WLS	0.508419	3.11e-18	4.82e-14
GTF3C4	0.508468	3.08e-18	4.78e-14
ERCC4	0.508473	3.08e-18	4.77e-14
UTP14C	0.508649	2.99e-18	4.63e-14
ISM2	0.508708	2.96e-18	4.58e-14
ARHGAP21	0.508745	2.94e-18	4.55e-14
BAZ1B	0.508778	2.92e-18	4.52e-14
DCP1A	0.508848	2.89e-18	4.47e-14
PNMA2	0.508861	2.88e-18	4.46e-14
ADAM28	0.508879	2.87e-18	4.44e-14
FAM169A	0.508961	2.83e-18	4.38e-14
SPATA13	0.509001	2.81e-18	4.35e-14
ITGB4	0.509035	2.79e-18	4.32e-14
LZTFL1	0.509038	2.79e-18	4.32e-14
TMEM51-AS1	0.509092	2.76e-18	4.28e-14
SSX2IP	0.509103	2.76e-18	4.27e-14
SLC14A1	0.509119	2.75e-18	4.26e-14
MN1	0.509183	2.72e-18	4.21e-14
NAP1L3	0.509185	2.72e-18	4.21e-14
SLCO2B1	0.50923	2.7e-18	4.18e-14
EVI2B	0.509292	2.67e-18	4.13e-14
SMAD7	0.509407	2.61e-18	4.05e-14
ADAM23	0.509497	2.57e-18	3.98e-14
ITGAV	0.509531	2.56e-18	3.96e-14
WNK1	0.509585	2.53e-18	3.92e-14
FAM184A	0.509664	2.5e-18	3.87e-14
ADCY9	0.509716	2.48e-18	3.83e-14
STK4	0.509857	2.41e-18	3.74e-14
TRIO	0.509866	2.41e-18	3.73e-14
CSF1R	0.509918	2.39e-18	3.7e-14
VWA8	0.510057	2.33e-18	3.61e-14
AGPS	0.510129	2.3e-18	3.56e-14
BHLHB9	0.510198	2.27e-18	3.52e-14
HAUS2	0.510284	2.24e-18	3.47e-14
FZD10	0.510344	2.22e-18	3.43e-14
RNF219	0.510549	2.14e-18	3.31e-14
STK33	0.510579	2.12e-18	3.29e-14
CELSR2	0.510589	2.12e-18	3.28e-14
ZNF689	0.510656	2.1e-18	3.25e-14
ZNF45	0.510696	2.08e-18	3.22e-14
MTMR9	0.510754	2.06e-18	3.19e-14
ZNF813	0.510776	2.05e-18	3.18e-14
USP8	0.51083	2.03e-18	3.15e-14
SYDE1	0.510868	2.02e-18	3.13e-14
HAS3	0.51092	2e-18	3.1e-14
MMP14	0.511057	1.95e-18	3.02e-14
FAM167A	0.511122	1.93e-18	2.99e-14
ESYT2	0.511129	1.93e-18	2.98e-14
ZNF532	0.511156	1.92e-18	2.97e-14
NR2F1-AS1	0.511186	1.91e-18	2.95e-14
BCHE	0.511218	1.9e-18	2.94e-14
ID4	0.511348	1.85e-18	2.87e-14
KCTD18	0.511551	1.79e-18	2.77e-14
CD109	0.511621	1.77e-18	2.73e-14
RAPGEF1	0.511891	1.68e-18	2.61e-14
MPEG1	0.511924	1.67e-18	2.59e-14
NOL4L	0.512123	1.61e-18	2.5e-14
FRS2	0.512219	1.59e-18	2.46e-14
BPTF	0.512266	1.57e-18	2.44e-14
FHL2	0.512347	1.55e-18	2.4e-14
INPP5D	0.512406	1.54e-18	2.38e-14
MAPK1	0.512465	1.52e-18	2.35e-14
NFKB1	0.512486	1.51e-18	2.34e-14
PDPN	0.512571	1.49e-18	2.31e-14
PLCXD2	0.512582	1.49e-18	2.3e-14
KLF3	0.512685	1.46e-18	2.26e-14
TRIM35	0.512806	1.43e-18	2.21e-14
ARMC8	0.512866	1.41e-18	2.19e-14
GON4L	0.512894	1.41e-18	2.18e-14
SNTB1	0.512968	1.39e-18	2.15e-14
ZNF292	0.513161	1.34e-18	2.08e-14
TM6SF1	0.513206	1.33e-18	2.06e-14
KIDINS220	0.51341	1.28e-18	1.99e-14
GAREM1	0.513414	1.28e-18	1.99e-14
CCDC80	0.513546	1.25e-18	1.94e-14
MYOZ3	0.513638	1.23e-18	1.91e-14
MRC1	0.513706	1.22e-18	1.88e-14
TCAF1	0.513856	1.18e-18	1.83e-14
ASB3	0.514017	1.15e-18	1.78e-14
CX3CL1	0.51406	1.14e-18	1.77e-14
EIF4E3	0.514099	1.13e-18	1.76e-14
CYYR1	0.514167	1.12e-18	1.73e-14
RAB38	0.514273	1.1e-18	1.7e-14
PPP1R2P3	0.514496	1.06e-18	1.64e-14
ERBB2IP	0.514506	1.05e-18	1.63e-14
AP1S2	0.514572	1.04e-18	1.61e-14
ERC2	0.514704	1.02e-18	1.58e-14
ADAMTS12	0.514707	1.02e-18	1.57e-14
NCS1	0.514737	1.01e-18	1.57e-14
EP400	0.514752	1.01e-18	1.56e-14
FLI1	0.514777	1e-18	1.55e-14
PHF19	0.514795	1e-18	1.55e-14
GIT2	0.514827	9.95e-19	1.54e-14
GPR157	0.515089	9.49e-19	1.47e-14
MYOM1	0.515183	9.33e-19	1.45e-14
ANXA4	0.515277	9.18e-19	1.42e-14
MBTPS1	0.515325	9.1e-19	1.41e-14
ACTC1	0.515342	9.07e-19	1.4e-14
CLOCK	0.51542	8.94e-19	1.38e-14
SH3BGRL2	0.515429	8.93e-19	1.38e-14
SMCHD1	0.515636	8.6e-19	1.33e-14
NIPAL4	0.515687	8.52e-19	1.32e-14
NTRK3	0.515697	8.51e-19	1.32e-14
ZNF436	0.51571	8.49e-19	1.31e-14
SOX2-OT	0.515841	8.29e-19	1.28e-14
NUP153	0.515878	8.23e-19	1.28e-14
EPHB1	0.516079	7.94e-19	1.23e-14
PDZD2	0.516115	7.89e-19	1.22e-14
TCF7L2	0.516276	7.66e-19	1.19e-14
ATF7	0.51633	7.59e-19	1.18e-14
PSTPIP2	0.516463	7.41e-19	1.15e-14
NCKAP1L	0.516547	7.3e-19	1.13e-14
FAM107A	0.516551	7.29e-19	1.13e-14
B4GALNT1	0.51669	7.11e-19	1.1e-14
TMEM132C	0.516895	6.85e-19	1.06e-14
GID4	0.516947	6.79e-19	1.05e-14
PAPD4	0.51696	6.77e-19	1.05e-14
ZMYM1	0.51729	6.38e-19	9.88e-15
XPO4	0.517344	6.32e-19	9.78e-15
C6ORF89	0.517614	6.01e-19	9.31e-15
KLHDC10	0.517635	5.99e-19	9.28e-15
FRAS1	0.517849	5.76e-19	8.92e-15
CDH6	0.517893	5.72e-19	8.85e-15
PHF3	0.517934	5.67e-19	8.79e-15
ZFP1	0.517935	5.67e-19	8.79e-15
DAAM1	0.51797	5.64e-19	8.73e-15
PRKAR2A	0.518009	5.6e-19	8.67e-15
CMTR2	0.51805	5.56e-19	8.6e-15
LRP1	0.518074	5.53e-19	8.57e-15
RSF1	0.518328	5.28e-19	8.18e-15
TTC33	0.518357	5.25e-19	8.14e-15
TEP1	0.518468	5.15e-19	7.97e-15
ANKRD11	0.518516	5.11e-19	7.91e-15
SCN3A	0.518528	5.09e-19	7.89e-15
KIAA1033	0.518679	4.96e-19	7.67e-15
PLXNA4	0.518807	4.84e-19	7.5e-15
SON	0.518899	4.76e-19	7.37e-15
HMGCLL1	0.518923	4.74e-19	7.34e-15
GPRASP2	0.519048	4.63e-19	7.18e-15
FTX	0.519053	4.63e-19	7.17e-15
UBR2	0.519059	4.62e-19	7.16e-15
PHKG1	0.519133	4.56e-19	7.06e-15
FHL5	0.519297	4.43e-19	6.86e-15
FMNL3	0.519304	4.42e-19	6.85e-15
IPMK	0.519322	4.41e-19	6.83e-15
RSBN1	0.519705	4.11e-19	6.36e-15
BIRC6	0.519757	4.07e-19	6.3e-15
MB21D1	0.519918	3.95e-19	6.12e-15
TBC1D1	0.520144	3.79e-19	5.87e-15
DZIP3	0.520316	3.67e-19	5.69e-15
CASS4	0.520353	3.65e-19	5.65e-15
ARNT	0.520456	3.58e-19	5.55e-15
BCL2	0.520457	3.58e-19	5.55e-15
C1S	0.520507	3.55e-19	5.5e-15
FNDC3B	0.520536	3.53e-19	5.47e-15
N4BP2	0.520552	3.52e-19	5.45e-15
SLC2A4	0.520629	3.47e-19	5.37e-15
EP300	0.520683	3.44e-19	5.32e-15
RAPGEF6	0.520724	3.41e-19	5.28e-15
TMEM246	0.520833	3.34e-19	5.18e-15
PTGER3	0.520841	3.34e-19	5.17e-15
NCOR1	0.520849	3.33e-19	5.16e-15
LRRC4C	0.52092	3.29e-19	5.09e-15
FBN2	0.521106	3.18e-19	4.92e-15
SVEP1	0.521116	3.17e-19	4.91e-15
JMJD1C	0.521182	3.14e-19	4.86e-15
ARHGAP1	0.521262	3.09e-19	4.79e-15
ARIH1	0.521355	3.04e-19	4.7e-15
DRP2	0.521399	3.01e-19	4.67e-15
SPIN1	0.521401	3.01e-19	4.66e-15
STON1	0.521417	3e-19	4.65e-15
RGS4	0.521763	2.82e-19	4.36e-15
NCOA7	0.521778	2.81e-19	4.35e-15
RAVER2	0.521945	2.73e-19	4.22e-15
ITGB6	0.52203	2.68e-19	4.15e-15
NEDD1	0.522717	2.36e-19	3.66e-15
DENND4C	0.522749	2.35e-19	3.64e-15
SH3BP5	0.522812	2.32e-19	3.6e-15
CARMN	0.522853	2.31e-19	3.57e-15
CHAD	0.523112	2.2e-19	3.4e-15
ZMAT3	0.523397	2.08e-19	3.23e-15
TMEM71	0.52343	2.07e-19	3.21e-15
ERLIN1	0.523546	2.03e-19	3.14e-15
SBNO1	0.523582	2.01e-19	3.12e-15
NIPBL	0.523767	1.95e-19	3.01e-15
ANKRD26	0.523816	1.93e-19	2.99e-15
CD84	0.523847	1.92e-19	2.97e-15
COL17A1	0.523878	1.91e-19	2.95e-15
SOCS7	0.523992	1.87e-19	2.89e-15
FAM63B	0.523997	1.87e-19	2.89e-15
SNORD116-4	0.524134	1.82e-19	2.82e-15
PI15	0.524273	1.77e-19	2.74e-15
NUP160	0.524279	1.77e-19	2.74e-15
WDR44	0.524367	1.74e-19	2.7e-15
LRRK1	0.524409	1.73e-19	2.68e-15
DLG5	0.524453	1.71e-19	2.65e-15
KIF26B	0.524456	1.71e-19	2.65e-15
USP34	0.524657	1.65e-19	2.56e-15
PHC3	0.524736	1.63e-19	2.52e-15
POC1B	0.524775	1.61e-19	2.5e-15
KANSL1L	0.524814	1.6e-19	2.48e-15
FRRS1	0.524825	1.6e-19	2.48e-15
AKAP12	0.524845	1.59e-19	2.47e-15
CACNB4	0.524935	1.57e-19	2.43e-15
ZNF655	0.525069	1.53e-19	2.37e-15
RBSN	0.525078	1.53e-19	2.36e-15
LCP2	0.525147	1.51e-19	2.33e-15
WIPF2	0.525186	1.5e-19	2.32e-15
KANSL1	0.52519	1.49e-19	2.31e-15
ATM	0.525291	1.47e-19	2.27e-15
KIAA1217	0.525396	1.44e-19	2.23e-15
NIPAL1	0.525543	1.4e-19	2.17e-15
DOCK10	0.52556	1.4e-19	2.16e-15
WDFY3	0.525732	1.35e-19	2.09e-15
PMP22	0.525813	1.33e-19	2.06e-15
CDS2	0.525828	1.33e-19	2.06e-15
NCR3LG1	0.525896	1.31e-19	2.03e-15
CSDE1	0.525974	1.29e-19	2e-15
PDZD8	0.526081	1.27e-19	1.96e-15
KRBA2	0.526193	1.24e-19	1.92e-15
CTDSPL2	0.526383	1.2e-19	1.85e-15
UBXN7	0.526456	1.18e-19	1.83e-15
DNAH11	0.526515	1.17e-19	1.81e-15
MICAL3	0.526529	1.16e-19	1.8e-15
ST8SIA1	0.526533	1.16e-19	1.8e-15
TNRC6B	0.526674	1.13e-19	1.76e-15
MASP2	0.52673	1.12e-19	1.74e-15
ZZEF1	0.526815	1.1e-19	1.71e-15
TRERF1	0.526892	1.09e-19	1.68e-15
ATF2	0.526945	1.08e-19	1.67e-15
UBQLN2	0.526973	1.07e-19	1.66e-15
VPS4B	0.527256	1.02e-19	1.57e-15
SNX27	0.527286	1.01e-19	1.57e-15
EPHA2	0.527318	1e-19	1.56e-15
COL5A1	0.527451	9.8e-20	1.52e-15
PALMD	0.527522	9.67e-20	1.5e-15
DFNA5	0.527531	9.65e-20	1.49e-15
PRKAR1A	0.527574	9.58e-20	1.48e-15
KIAA0825	0.527609	9.51e-20	1.47e-15
KANK4	0.527611	9.51e-20	1.47e-15
FBXO17	0.527671	9.4e-20	1.46e-15
RUNX2	0.528009	8.83e-20	1.37e-15
LRRCC1	0.528161	8.58e-20	1.33e-15
WDR35	0.528307	8.35e-20	1.29e-15
KAT6B	0.528339	8.3e-20	1.28e-15
PROM1	0.528509	8.03e-20	1.24e-15
SFXN3	0.528699	7.75e-20	1.2e-15
SMC1A	0.528835	7.56e-20	1.17e-15
FAM168A	0.528857	7.52e-20	1.17e-15
MAGI1	0.52897	7.37e-20	1.14e-15
TAF1	0.529076	7.22e-20	1.12e-15
AKNA	0.529128	7.15e-20	1.11e-15
LIMS1	0.529209	7.04e-20	1.09e-15
TUBGCP3	0.529215	7.03e-20	1.09e-15
AFF4	0.529225	7.02e-20	1.09e-15
LRP6	0.529269	6.96e-20	1.08e-15
ZC3HAV1L	0.529373	6.83e-20	1.06e-15
NLGN1	0.529423	6.76e-20	1.05e-15
TRAK2	0.529494	6.67e-20	1.03e-15
ZBTB26	0.529527	6.63e-20	1.03e-15
P2RY14	0.529575	6.57e-20	1.02e-15
RARRES1	0.529627	6.51e-20	1.01e-15
SLC16A5	0.529727	6.39e-20	9.89e-16
PIP5K1B	0.52978	6.32e-20	9.79e-16
SLC7A6OS	0.529794	6.31e-20	9.76e-16
UPF2	0.529901	6.18e-20	9.57e-16
TRIM32	0.530065	5.99e-20	9.28e-16
PLXNA2	0.530288	5.74e-20	8.89e-16
PDE2A	0.530312	5.72e-20	8.85e-16
TPM1	0.530314	5.71e-20	8.85e-16
FYB	0.530376	5.65e-20	8.75e-16
IL1RL1	0.530465	5.55e-20	8.6e-16
UHRF1BP1L	0.530488	5.53e-20	8.56e-16
SMAD4	0.530491	5.53e-20	8.56e-16
ZNF551	0.5305	5.52e-20	8.54e-16
TGFBR1	0.530559	5.46e-20	8.45e-16
GBP4	0.530737	5.28e-20	8.17e-16
NPC1	0.53077	5.24e-20	8.12e-16
HUWE1	0.530795	5.22e-20	8.08e-16
NOTCH1	0.5312	4.83e-20	7.48e-16
ZBTB40	0.531201	4.83e-20	7.48e-16
ZNF844	0.531214	4.82e-20	7.46e-16
POLR2A	0.531236	4.8e-20	7.43e-16
LIFR	0.531254	4.78e-20	7.41e-16
MAN2A1	0.531289	4.75e-20	7.36e-16
AJAP1	0.531559	4.51e-20	6.99e-16
CREB3L2	0.531638	4.45e-20	6.88e-16
PRPH2	0.531707	4.39e-20	6.79e-16
CCDC181	0.531784	4.32e-20	6.7e-16
LDB1	0.531809	4.3e-20	6.66e-16
RIF1	0.531972	4.17e-20	6.46e-16
RUNX1	0.532124	4.05e-20	6.28e-16
USP9X	0.532192	4e-20	6.2e-16
DOCK2	0.532285	3.93e-20	6.09e-16
DESI2	0.532344	3.89e-20	6.02e-16
GRK5	0.532353	3.88e-20	6.01e-16
TBC1D5	0.532378	3.86e-20	5.98e-16
AGPAT4	0.53241	3.84e-20	5.94e-16
UGCG	0.532659	3.66e-20	5.67e-16
TNFSF8	0.532746	3.6e-20	5.58e-16
CHURC1	0.532779	3.58e-20	5.54e-16
LAX1	0.532853	3.53e-20	5.46e-16
RGS18	0.53296	3.46e-20	5.35e-16
HELB	0.533115	3.36e-20	5.2e-16
PDE4A	0.533188	3.31e-20	5.12e-16
NRXN3	0.533328	3.22e-20	4.99e-16
MTMR10	0.533333	3.22e-20	4.98e-16
NIPAL2	0.533473	3.13e-20	4.85e-16
SYPL2	0.533493	3.12e-20	4.83e-16
BMPR1A	0.533538	3.1e-20	4.79e-16
PARD3B	0.533696	3e-20	4.65e-16
DPH3P1	0.533776	2.96e-20	4.58e-16
PAFAH1B2	0.533913	2.88e-20	4.46e-16
PPP2R5C	0.533955	2.86e-20	4.42e-16
ADAT1	0.533987	2.84e-20	4.4e-16
C11ORF45	0.533997	2.83e-20	4.39e-16
CEP162	0.534039	2.81e-20	4.35e-16
PCDH19	0.534107	2.78e-20	4.3e-16
ZNF430	0.53422	2.72e-20	4.21e-16
ATE1	0.534235	2.71e-20	4.19e-16
SMURF1	0.534628	2.51e-20	3.89e-16
VAMP3	0.534652	2.5e-20	3.87e-16
ZNF385D	0.534845	2.41e-20	3.73e-16
CWF19L2	0.534999	2.34e-20	3.62e-16
DEK	0.535091	2.3e-20	3.56e-16
ANKRD50	0.535191	2.25e-20	3.49e-16
LOC100129034	0.535262	2.22e-20	3.44e-16
F13A1	0.535307	2.2e-20	3.41e-16
CNKSR2	0.535549	2.1e-20	3.26e-16
MTSS1L	0.535572	2.09e-20	3.24e-16
RCBTB2	0.535688	2.05e-20	3.17e-16
TTLL5	0.535724	2.03e-20	3.15e-16
KPNA6	0.535816	2e-20	3.09e-16
KCTD7	0.535918	1.96e-20	3.03e-16
NUDT21	0.535962	1.94e-20	3.01e-16
RASA2	0.536059	1.91e-20	2.95e-16
PITPNM3	0.536064	1.91e-20	2.95e-16
ITGA4	0.536156	1.87e-20	2.9e-16
FAM179B	0.536171	1.87e-20	2.89e-16
GPAT3	0.536177	1.86e-20	2.89e-16
RGAG4	0.53622	1.85e-20	2.86e-16
LMO3	0.536249	1.84e-20	2.85e-16
EGFLAM	0.536411	1.78e-20	2.76e-16
TMEM170A	0.536516	1.75e-20	2.7e-16
LIPA	0.536934	1.61e-20	2.49e-16
ELMSAN1	0.537101	1.56e-20	2.41e-16
MEF2D	0.537117	1.55e-20	2.41e-16
OSBPL10	0.537188	1.53e-20	2.37e-16
EPHA7	0.537297	1.5e-20	2.32e-16
SMIM10	0.537433	1.46e-20	2.26e-16
KLHL29	0.53745	1.46e-20	2.26e-16
C8ORF31	0.537534	1.43e-20	2.22e-16
GIMAP6	0.537537	1.43e-20	2.22e-16
AP3B1	0.537655	1.4e-20	2.17e-16
ASB5	0.537723	1.38e-20	2.14e-16
ZDHHC20	0.537725	1.38e-20	2.14e-16
TXLNG	0.537733	1.38e-20	2.14e-16
HMGN4	0.537741	1.38e-20	2.13e-16
ITPRIP	0.537843	1.35e-20	2.09e-16
SOCS6	0.537848	1.35e-20	2.09e-16
PLCB1	0.538037	1.3e-20	2.01e-16
WASF2	0.538092	1.29e-20	1.99e-16
ADGRE2	0.538402	1.21e-20	1.88e-16
ACOX2	0.538497	1.19e-20	1.84e-16
HRASLS5	0.538507	1.19e-20	1.84e-16
RAB27B	0.538535	1.18e-20	1.83e-16
NOTCH2	0.538764	1.13e-20	1.75e-16
EFHD1	0.538808	1.12e-20	1.73e-16
PRRC2C	0.538815	1.12e-20	1.73e-16
CXORF57	0.538874	1.11e-20	1.71e-16
TINAGL1	0.538884	1.1e-20	1.71e-16
KIF2A	0.538929	1.09e-20	1.69e-16
CSF2RB	0.539055	1.07e-20	1.65e-16
RSPO2	0.539111	1.06e-20	1.63e-16
PDE8A	0.539118	1.05e-20	1.63e-16
TANGO6	0.539309	1.02e-20	1.57e-16
PLP1	0.539378	1e-20	1.55e-16
FAM153A	0.53948	9.82e-21	1.52e-16
APOL6	0.539493	9.8e-21	1.52e-16
TMEM64	0.539985	8.9e-21	1.38e-16
PTPN9	0.540053	8.78e-21	1.36e-16
ADRA1D	0.540131	8.65e-21	1.34e-16
RBPMS	0.540195	8.54e-21	1.32e-16
NCKAP1	0.540197	8.54e-21	1.32e-16
DENND4A	0.540308	8.35e-21	1.29e-16
CENPC	0.540416	8.18e-21	1.27e-16
ZBED3	0.54054	7.98e-21	1.24e-16
DGKG	0.541112	7.14e-21	1.11e-16
ETS2	0.541155	7.08e-21	1.1e-16
ARL4C	0.54116	7.07e-21	1.09e-16
TAOK1	0.541338	6.83e-21	1.06e-16
EFNA5	0.541356	6.8e-21	1.05e-16
NEK9	0.541408	6.73e-21	1.04e-16
GUCY1A2	0.541843	6.18e-21	9.57e-17
CASC15	0.541908	6.1e-21	9.45e-17
SOSTDC1	0.542077	5.9e-21	9.14e-17
FBXL22	0.542103	5.87e-21	9.1e-17
KLHL2	0.542154	5.82e-21	9.01e-17
PAMR1	0.542188	5.78e-21	8.95e-17
ZNF665	0.542328	5.62e-21	8.7e-17
PPP2R3A	0.542436	5.5e-21	8.52e-17
SLC1A3	0.542444	5.49e-21	8.51e-17
UBE3B	0.542464	5.47e-21	8.47e-17
DYSF	0.542477	5.46e-21	8.45e-17
CDKAL1	0.542537	5.39e-21	8.35e-17
MDM1	0.54256	5.37e-21	8.31e-17
IRF2	0.542622	5.3e-21	8.21e-17
ICE1	0.542655	5.27e-21	8.16e-17
TCF7L1	0.542762	5.16e-21	7.99e-17
SOX6	0.542786	5.13e-21	7.95e-17
RCSD1	0.543083	4.84e-21	7.5e-17
ISL1	0.543188	4.74e-21	7.34e-17
SLC35D1	0.54327	4.67e-21	7.23e-17
BTN2A3P	0.54345	4.5e-21	6.97e-17
MDN1	0.543591	4.38e-21	6.78e-17
ERMP1	0.543632	4.34e-21	6.73e-17
SKI	0.543706	4.28e-21	6.63e-17
LINC00908	0.543728	4.26e-21	6.6e-17
KPNA5	0.543855	4.16e-21	6.44e-17
CECR1	0.543893	4.13e-21	6.39e-17
DNAJC27	0.544171	3.9e-21	6.05e-17
MS4A2	0.544308	3.8e-21	5.88e-17
RHBDL3	0.544406	3.73e-21	5.77e-17
PTRF	0.544432	3.71e-21	5.74e-17
GLIS2	0.544451	3.69e-21	5.72e-17
CFLAR	0.544548	3.62e-21	5.61e-17
PCDHGA6	0.544585	3.6e-21	5.57e-17
PAQR8	0.544721	3.5e-21	5.42e-17
CHD2	0.544792	3.45e-21	5.35e-17
CTNNB1	0.544857	3.41e-21	5.28e-17
TPBG	0.544861	3.41e-21	5.27e-17
FGFR2	0.544979	3.33e-21	5.15e-17
PLBD1	0.545108	3.24e-21	5.02e-17
SYNJ1	0.545219	3.17e-21	4.91e-17
CD3G	0.545313	3.11e-21	4.82e-17
SPATA18	0.545336	3.1e-21	4.8e-17
ETV1	0.545397	3.06e-21	4.74e-17
GREB1L	0.545411	3.05e-21	4.73e-17
ZNF843	0.545475	3.01e-21	4.67e-17
ZDHHC15	0.545646	2.91e-21	4.51e-17
HSPB7	0.545745	2.86e-21	4.42e-17
IP6K3	0.545838	2.8e-21	4.34e-17
SNAP25	0.545985	2.72e-21	4.22e-17
MMGT1	0.545988	2.72e-21	4.21e-17
TMEM106B	0.546081	2.67e-21	4.14e-17
XPC	0.546097	2.66e-21	4.12e-17
TGFB2	0.546187	2.62e-21	4.05e-17
ZNF391	0.546255	2.58e-21	3.99e-17
RBFOX3	0.546264	2.58e-21	3.99e-17
CARD6	0.546485	2.46e-21	3.82e-17
LATS1	0.546526	2.44e-21	3.78e-17
PURA	0.546705	2.36e-21	3.65e-17
PPP1R3C	0.546727	2.35e-21	3.64e-17
WDR36	0.546787	2.32e-21	3.59e-17
ANKFY1	0.546818	2.31e-21	3.57e-17
RSPO1	0.546852	2.29e-21	3.55e-17
NATD1	0.546897	2.27e-21	3.51e-17
ZNF791	0.547089	2.18e-21	3.38e-17
RASSF8	0.547119	2.17e-21	3.36e-17
STXBP4	0.547154	2.16e-21	3.34e-17
ADGRG6	0.547208	2.13e-21	3.3e-17
CHRFAM7A	0.547223	2.13e-21	3.29e-17
EBF1	0.547297	2.09e-21	3.24e-17
SKIL	0.547358	2.07e-21	3.2e-17
ABCA6	0.547548	1.99e-21	3.08e-17
TRIM34	0.547567	1.98e-21	3.07e-17
JMY	0.547602	1.97e-21	3.05e-17
ROBO2	0.547657	1.95e-21	3.02e-17
PLA2R1	0.547705	1.93e-21	2.99e-17
PAQR3	0.547723	1.92e-21	2.98e-17
AKAP10	0.547743	1.92e-21	2.97e-17
DPY19L2P2	0.547875	1.87e-21	2.89e-17
ABCA1	0.54788	1.86e-21	2.89e-17
FGD5	0.547912	1.85e-21	2.87e-17
C3ORF58	0.548026	1.81e-21	2.8e-17
TRO	0.54815	1.77e-21	2.73e-17
TCEAL7	0.548168	1.76e-21	2.72e-17
RECK	0.548546	1.63e-21	2.52e-17
AMIGO1	0.548677	1.59e-21	2.46e-17
GPATCH11	0.548722	1.57e-21	2.44e-17
OXR1	0.548745	1.57e-21	2.43e-17
MYO18A	0.548919	1.51e-21	2.34e-17
DPP8	0.549078	1.46e-21	2.27e-17
BTBD19	0.549108	1.46e-21	2.25e-17
GIPC2	0.549576	1.32e-21	2.05e-17
PRRG1	0.549623	1.31e-21	2.03e-17
THBS1	0.549624	1.31e-21	2.03e-17
MAP3K12	0.549681	1.3e-21	2.01e-17
ATL2	0.549707	1.29e-21	2e-17
C4ORF36	0.549784	1.27e-21	1.97e-17
SLC12A4	0.549856	1.25e-21	1.94e-17
LRCH3	0.549879	1.25e-21	1.93e-17
ANKRD45	0.549913	1.24e-21	1.92e-17
NAB1	0.549943	1.23e-21	1.91e-17
MRAS	0.549964	1.23e-21	1.9e-17
MBNL3	0.55003	1.21e-21	1.87e-17
TNNI3K	0.550232	1.16e-21	1.8e-17
HOXD13	0.550402	1.12e-21	1.74e-17
PPARA	0.550507	1.1e-21	1.7e-17
CD226	0.550523	1.09e-21	1.69e-17
CRKL	0.550588	1.08e-21	1.67e-17
PLAG1	0.55067	1.06e-21	1.64e-17
SLC25A24	0.550674	1.06e-21	1.64e-17
KLF10	0.550813	1.03e-21	1.6e-17
ZNF268	0.550818	1.03e-21	1.6e-17
LRRN3	0.550964	1e-21	1.55e-17
SULF1	0.550998	9.94e-22	1.54e-17
CNOT6L	0.55123	9.48e-22	1.47e-17
DDHD2	0.551304	9.34e-22	1.45e-17
PTPRZ1	0.551567	8.85e-22	1.37e-17
HIVEP3	0.551569	8.85e-22	1.37e-17
RSPO3	0.551691	8.63e-22	1.34e-17
HTR7	0.551729	8.57e-22	1.33e-17
LIMA1	0.551891	8.29e-22	1.28e-17
POF1B	0.552063	8.01e-22	1.24e-17
HIPK1	0.552158	7.85e-22	1.22e-17
MTMR11	0.552237	7.73e-22	1.2e-17
NBEAL1	0.552299	7.63e-22	1.18e-17
JPH2	0.552616	7.15e-22	1.11e-17
AHDC1	0.552732	6.98e-22	1.08e-17
UBR1	0.552759	6.95e-22	1.08e-17
ZFYVE26	0.552787	6.91e-22	1.07e-17
APC	0.553311	6.21e-22	9.61e-18
EVI5	0.553459	6.02e-22	9.32e-18
KAT2B	0.553472	6.01e-22	9.3e-18
WDR31	0.553596	5.86e-22	9.07e-18
FAM175A	0.553819	5.59e-22	8.66e-18
PCGF5	0.553991	5.4e-22	8.36e-18
RASGEF1B	0.55414	5.24e-22	8.11e-18
HOXA13	0.554216	5.16e-22	7.99e-18
MYH9	0.554312	5.06e-22	7.83e-18
LINC00346	0.55438	4.99e-22	7.72e-18
FAM126A	0.5545	4.87e-22	7.53e-18
PIK3C2B	0.55493	4.45e-22	6.9e-18
NUAK1	0.554941	4.44e-22	6.88e-18
PIWIL2	0.555035	4.36e-22	6.75e-18
RCAN2	0.555283	4.14e-22	6.41e-18
ZNF81	0.555344	4.09e-22	6.33e-18
FAT2	0.555425	4.02e-22	6.23e-18
PRDM1	0.555427	4.02e-22	6.23e-18
AKAP13	0.555585	3.89e-22	6.03e-18
MXRA7	0.555677	3.82e-22	5.92e-18
TBX5	0.555834	3.7e-22	5.73e-18
TTC39B	0.55596	3.6e-22	5.58e-18
HECW1	0.555961	3.6e-22	5.58e-18
ITGA5	0.556163	3.46e-22	5.35e-18
LPIN1	0.556211	3.42e-22	5.3e-18
LDLRAD4	0.556232	3.41e-22	5.28e-18
ZNF221	0.556236	3.4e-22	5.27e-18
UBE4B	0.556368	3.31e-22	5.13e-18
GBP1	0.556396	3.29e-22	5.1e-18
ATXN1	0.556454	3.25e-22	5.04e-18
ATP8B1	0.556459	3.25e-22	5.03e-18
STAG1	0.556535	3.2e-22	4.96e-18
PLEKHG2	0.556994	2.91e-22	4.51e-18
DDX3Y	0.557143	2.82e-22	4.37e-18
DKK3	0.557205	2.79e-22	4.31e-18
COL8A2	0.557221	2.78e-22	4.3e-18
NRK	0.557222	2.78e-22	4.3e-18
SCN9A	0.55739	2.68e-22	4.15e-18
CAST	0.557426	2.66e-22	4.12e-18
RICTOR	0.557514	2.61e-22	4.05e-18
GFOD1	0.557599	2.57e-22	3.98e-18
ZFHX3	0.557653	2.54e-22	3.93e-18
ZNF208	0.55794	2.39e-22	3.71e-18
KIAA1107	0.55796	2.38e-22	3.69e-18
SOGA3	0.557972	2.38e-22	3.68e-18
ZNF486	0.55804	2.34e-22	3.63e-18
ASB2	0.558101	2.31e-22	3.58e-18
WSCD2	0.558159	2.29e-22	3.54e-18
KIAA1109	0.558253	2.24e-22	3.47e-18
RASL12	0.558294	2.22e-22	3.44e-18
CCNT1	0.558303	2.22e-22	3.44e-18
SMYD4	0.55831	2.22e-22	3.43e-18
ZNF641	0.55852	2.12e-22	3.28e-18
KAT6A	0.558532	2.12e-22	3.28e-18
ALAD	0.558554	2.11e-22	3.26e-18
ITGA7	0.55858	2.09e-22	3.24e-18
KLF9	0.558669	2.06e-22	3.18e-18
MB21D2	0.558826	1.99e-22	3.08e-18
[truncated: 1,209 more rows]
